# Supplementary material for: PHD1-dependent hydroxylation of RepoMan (CDCA2) on P604 modulates the control of mitotic progression
Source: eLife journal article supplement (doi:10.7554/elife.108131), 2025-08-15

Figure 2-source data 2

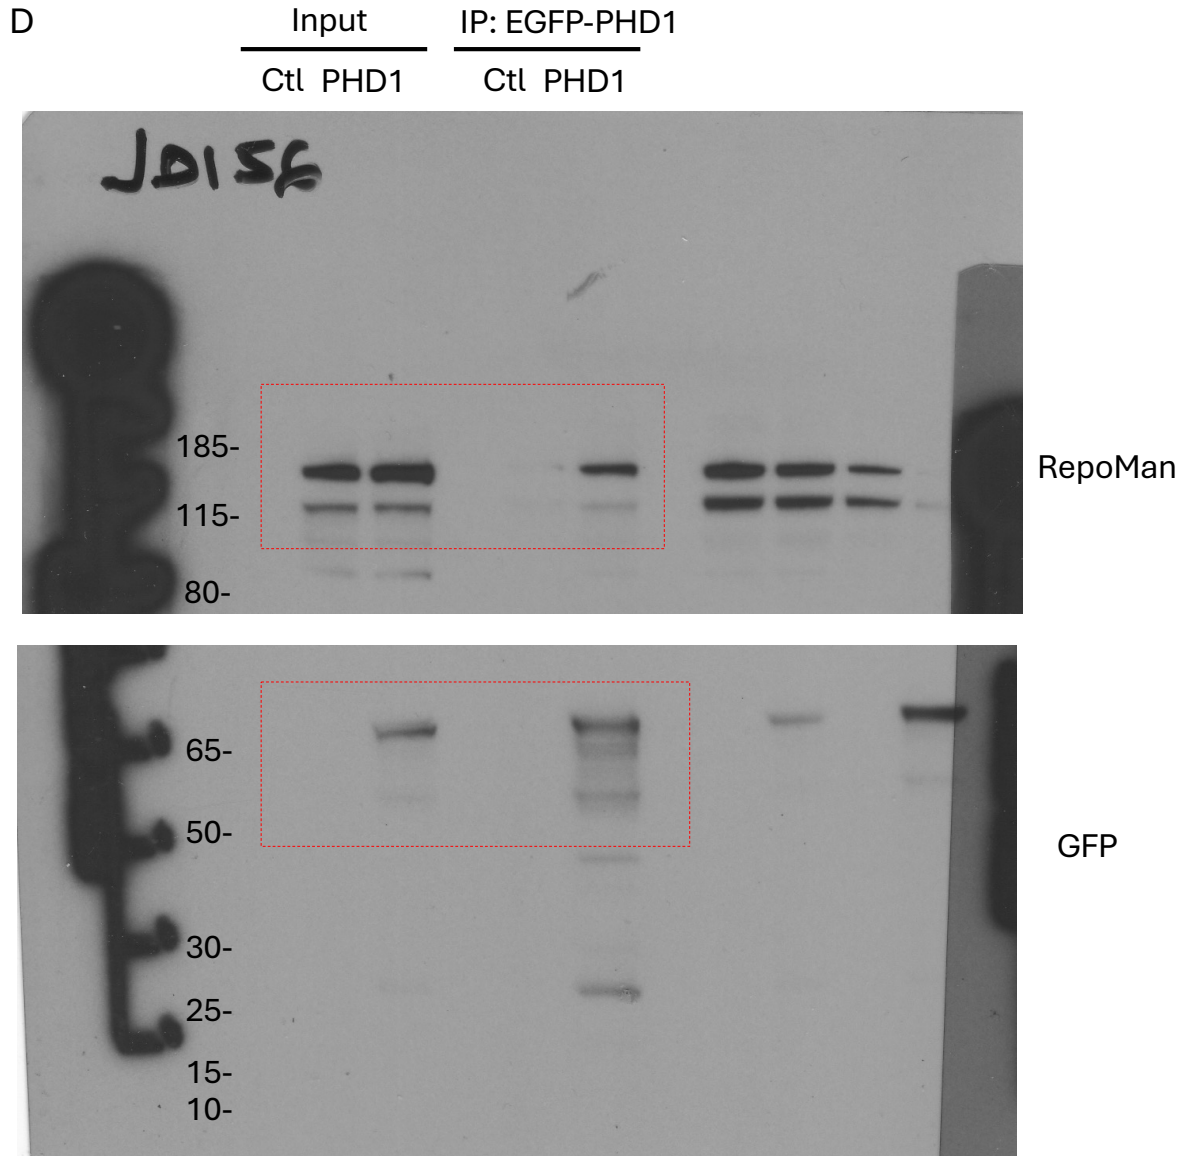

Supplement: fig2-data2 [file elife-108131-fig2-data2-v1.pdf]
