# Supplementary material for: PHD1-dependent hydroxylation of RepoMan (CDCA2) on P604 modulates the control of mitotic progression
Source: eLife journal article supplement (doi:10.7554/elife.108131), 2025-08-15
Supplement: fig2-data3 [file elife-108131-fig2-data3-v1.pdf]

Figure 2- source data 3

**Pearson's Correlation Coefficient (PCC)**

| Interphase | (Pro) metaphase | Anaphase |
|------------|-----------------|----------|
| 0.821      | 0.864           | 0.207    |
| 0.721      | 0.738           | 0.27     |
| 0.715      | 0.847           | 0.087    |
| 0.476      | 0.909           | 0.135    |
| 0.793      | 0.776           | 0.137    |
| 1          | 0.909           | 0.078    |
| 0.578      | 0.722           | 0        |
|            | 0.611           | 0.556    |
|            | 0.83            | 0.009    |
|            | 0.788           |          |
|            | 0.743           |          |
|            | 0.496           |          |
|            | 0.826           |          |
|            | 0.72            |          |
|            | 0.702           |          |
