# Supplementary material for: PHD1-dependent hydroxylation of RepoMan (CDCA2) on P604 modulates the control of mitotic progression
Source: eLife journal article supplement (doi:10.7554/elife.108131), 2025-08-15

Figure 3 -source data 2

C

1h post nocodazole arrest release  
siRNA: Ctl RM

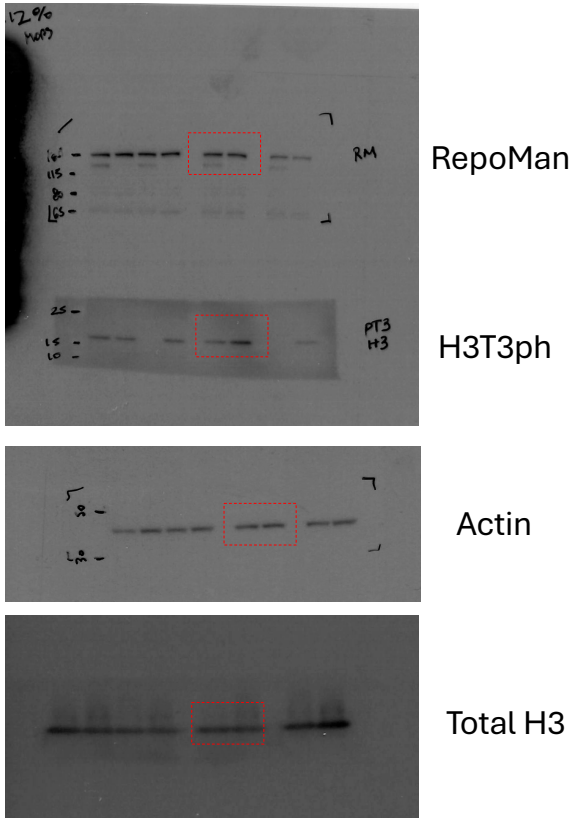

D

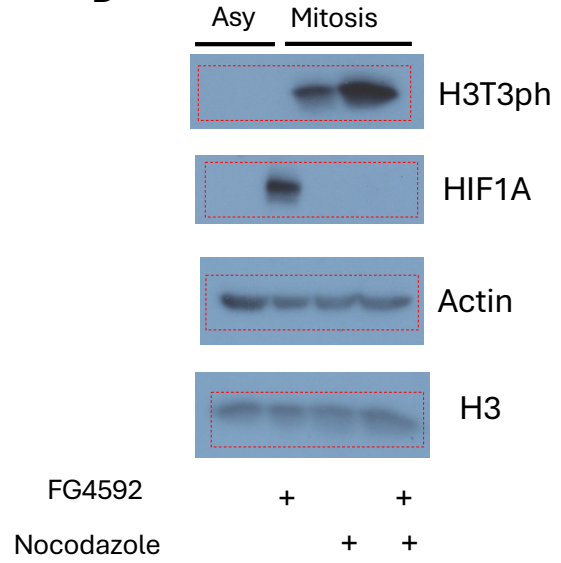

1h post nocodazole arrest release

Asy

H

siRNA Ctl Ctl PHD1 PHD2

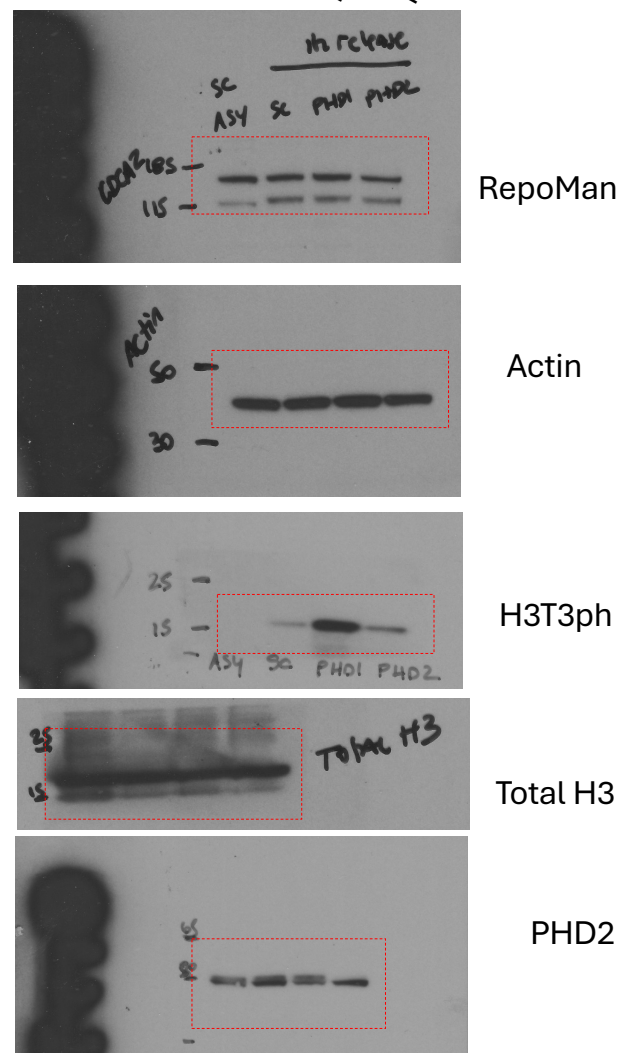

E

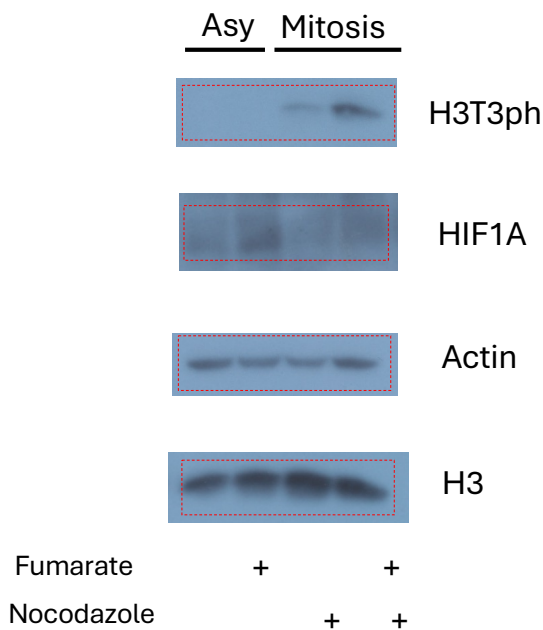

Supplement: fig3-data2 [file elife-108131-fig3-data2-v1.pdf]
