# Supplementary material for: PHD1-dependent hydroxylation of RepoMan (CDCA2) on P604 modulates the control of mitotic progression
Source: eLife journal article supplement (doi:10.7554/elife.108131), 2025-08-15
Supplement: fig3-data3 [file elife-108131-fig3-data3-v1.pdf]

Figure 3 -source data 3

| Control siRNA | PHD1 siRNA  | PHD2 siRNA  |
|---------------|-------------|-------------|
| 0.484775606   | 5.414823312 | 2.191418595 |
| 0.627699873   | 5.220218114 | 1.737001685 |
| 1.477834665   | 4.784583738 | 1.279431485 |
| 1.032613711   | 5.172521509 | 0.573500867 |
| 0.892820656   | 5.401095487 | 2.572239929 |
| 0.82384264    | 6.298551235 | 0.485832133 |
| 1.392087913   | 6.958830424 | 0.245070539 |
| 0.896328461   | 4.502070638 | 0.892832084 |
| 0.802221827   | 3.549731334 | 1.221345789 |
| 0.834924403   | 5.918092608 | 1.126192263 |
| 1.285420737   | 5.279316947 | 1.231957669 |
| 1.449429507   | 1.597256    | 1.742494    |
| 1.330069      | 3.308079    | 1.299057    |
| 0.356578      | 3.376616    | 1.597731    |
| 1.016322      | 2.427134    | 1.019172    |
| 0.628863      | 2.520175    | 0.464143    |
| 0.66785       | 2.315117    | 1.200403    |
| 1.538846      | 1.725679    | 0.838995    |
| 0.946558      | 3.624095    | 0.893349    |
| 1.420363      | 4.171761    | 0.655151    |
| 1.088058      | 2.859882    | 1.038676    |
| 0.987467      | 3.510389    | 1.393788    |
| 1.019026      | 2.387768    | 0.95770818  |
| 1.37078881    | 3.1974587   | 1.4611975   |
| 1.18334649    | 1.07967672  | 1.08333556  |
| 0.97770789    | 1.50341284  | 0.5853388   |
| 1.07270037    | 1.25769957  | 0.69110247  |
| 1.16386482    | 1.54303291  | 0.8355224   |
| 0.79765073    | 1.29854984  | 0.65623022  |
| 1.20954357    | 1.44938391  | 1.08142183  |
| 0.64793802    | 0.82603767  | 1.05013288  |
| 0.86029257    | 1.38487252  | 0.86278759  |
| 1.17143015    | 1.02204817  | 0.74069552  |
| 0.74019104    | 1.20068155  | 1.22106957  |
| 0.88081199    | 1.92292099  | 0.78243329  |
| 1.0445845     | 0.99149437  | 0.67384386  |
| 0.87914906    | 1.80920151  | 0.722973    |
| 0.893548      | 1.47692808  | 0.953061    |
| 0.645047      | 1.766206    | 1.072786    |

|          |          |          |
|----------|----------|----------|
| 1.030506 | 1.24839  | 0.663124 |
| 1.02857  | 1.666374 | 0.751257 |
| 1.121076 | 1.847781 | 1.048144 |
| 0.636908 | 1.852495 | 0.812475 |
| 1.548406 | 1.118754 | 1.009065 |
| 0.974483 | 1.234276 | 0.681206 |
| 0.722207 | 1.856335 | 0.938675 |
| 1.175076 | 1.839712 | 0.430219 |
| 1.224173 | 1.336102 |          |
|          | 1.65601  |          |
|          | 1.462145 |          |
|          | 2.920536 |          |
|          | 1.760123 |          |
|          | 1.980637 |          |
|          | 1.798561 |          |
|          | 1.787229 |          |
|          | 1.883486 |          |
|          | 0.857674 |          |
|          | 1.337355 |          |
|          | 1.530206 |          |
|          | 1.333691 |          |
|          | 1.258476 |          |
|          | 1.468759 |          |
