# Supplementary material for: PHD1-dependent hydroxylation of RepoMan (CDCA2) on P604 modulates the control of mitotic progression
Source: eLife journal article supplement (doi:10.7554/elife.108131), 2025-08-15
Supplement: fig3-figsupp1-data2 [file elife-108131-fig3-figsupp1-data2-v1.pdf]

Figure 3- figure supplement 1-source data 2

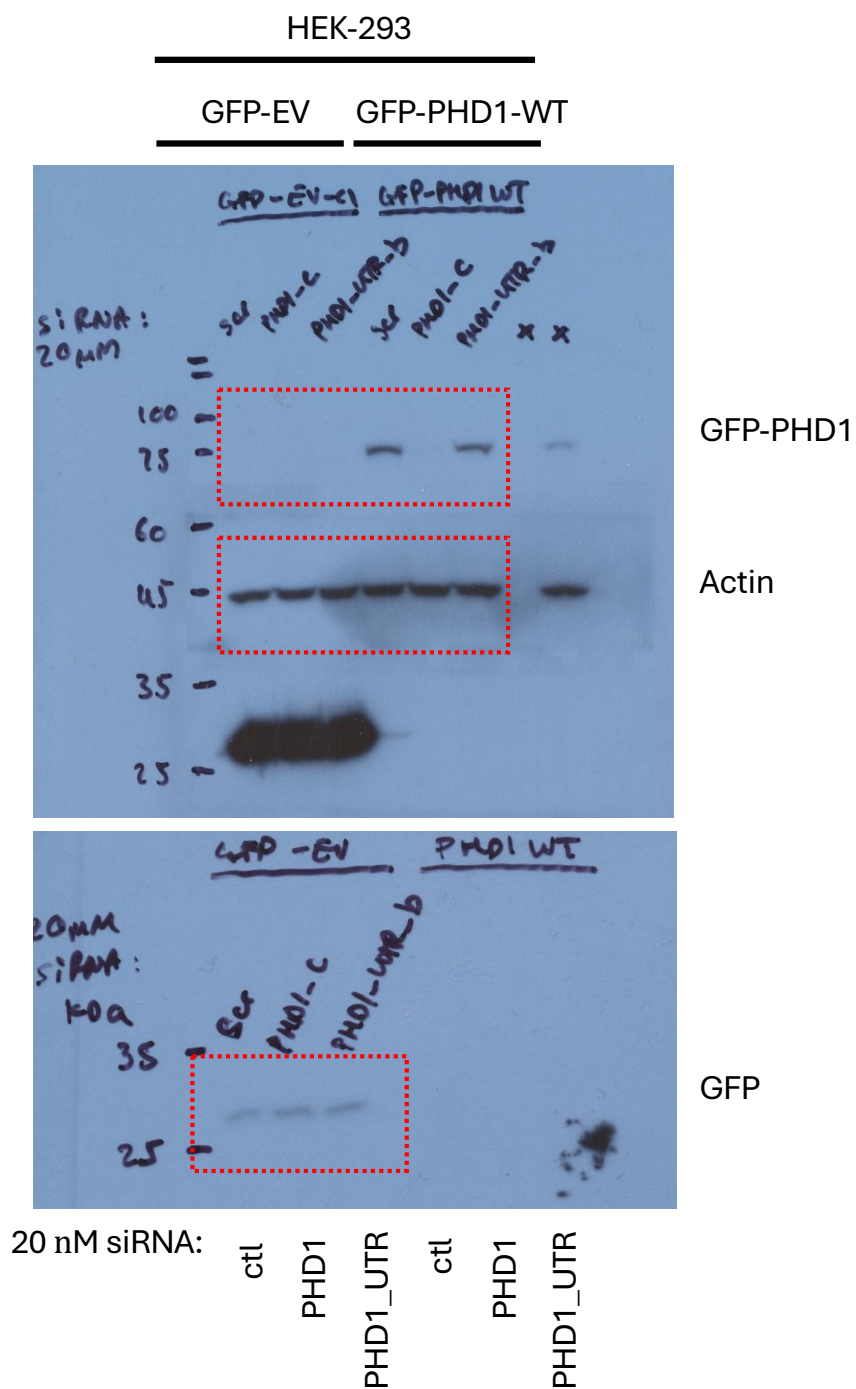

The lower membrane was washed with TBS\_T and re-probing with GFP to get cleaner / less exposed GFP bands in the empty vector lanes and those are show in Figure 3- figure supplement 1\_B.
