# Supplementary material for: PHD1-dependent hydroxylation of RepoMan (CDCA2) on P604 modulates the control of mitotic progression
Source: eLife journal article supplement (doi:10.7554/elife.108131), 2025-08-15
Supplement: fig4-data3 [file elife-108131-fig4-data3-v1.pdf]

Figure 4 -source data 3

| Experiment | Condition           | Distribution Foci |                | Distribution Diffuse |                | Total number of cells |
|------------|---------------------|-------------------|----------------|----------------------|----------------|-----------------------|
|            |                     | Number of cells   | Percentage (%) | Number of cells      | Percentage (%) |                       |
| <b>1</b>   | si RM - DOX         | 3                 | 20             | 12                   | 80             | 15                    |
|            | siRM + DOX (WT)     | 12                | 80             | 3                    | 20             | 15                    |
|            | si RM + DOX (P604A) | 10                | 50             | 10                   | 50             | 20                    |
| <b>2</b>   | si RM - DOX         | 2                 | 22.22222222    | 7                    | 77.77777778    | 9                     |
|            | siRM + DOX (WT)     | 6                 | 66.66666667    | 3                    | 33.33333333    | 9                     |
|            | si RM + DOX (P604A) | 5                 | 50             | 5                    | 50             | 10                    |
| <b>3</b>   | si RM - DOX         | 3                 | 25             | 9                    | 75             | 12                    |
|            | siRM + DOX (WT)     | 11                | 91.66666667    | 1                    | 8.333333333    | 12                    |
|            | si RM + DOX (P604A) | 1                 | 8.333333333    | 11                   | 91.66666667    | 12                    |
| <b>4</b>   | si RM - DOX         | 0                 | 0              | 10                   | 100            | 10                    |
|            | siRM + DOX (WT)     | 8                 | 80             | 2                    | 20             | 10                    |
|            | si RM + DOX (P604A) | 4                 | 40             | 6                    | 60             | 10                    |
