# Supplementary material for: PHD1-dependent hydroxylation of RepoMan (CDCA2) on P604 modulates the control of mitotic progression
Source: eLife journal article supplement (doi:10.7554/elife.108131), 2025-08-15
Supplement: fig5-data2 [file elife-108131-fig5-data2-v1.pdf]

Figure 5 -source data 2

C

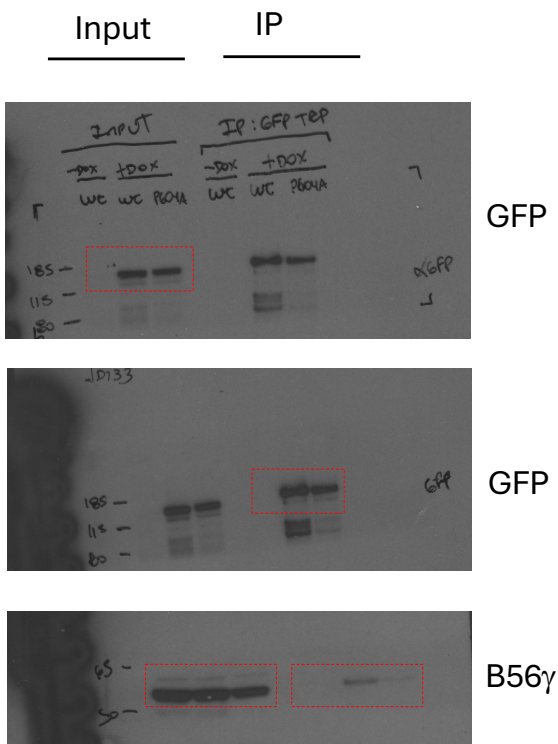

D

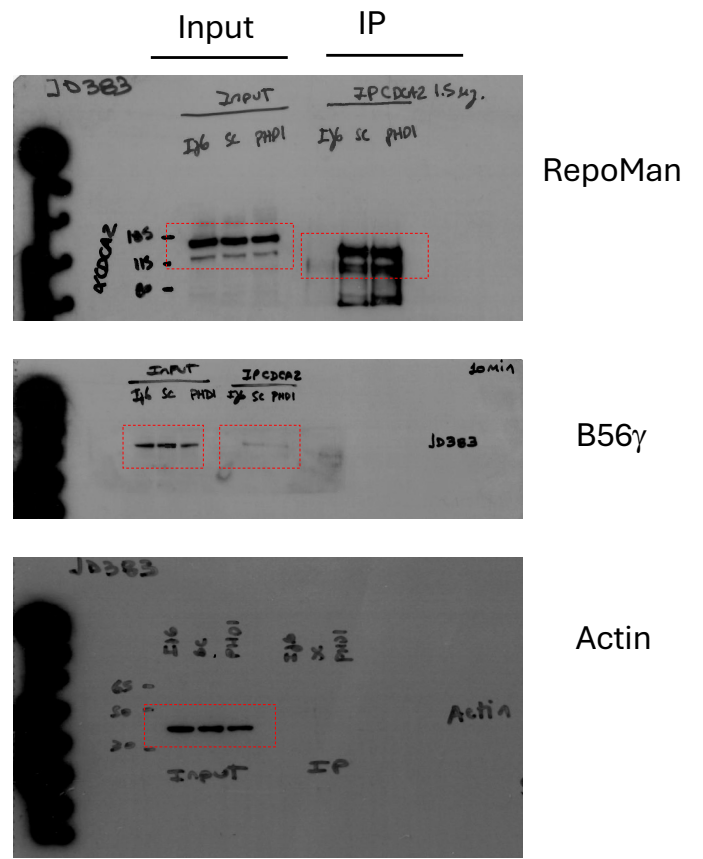

E

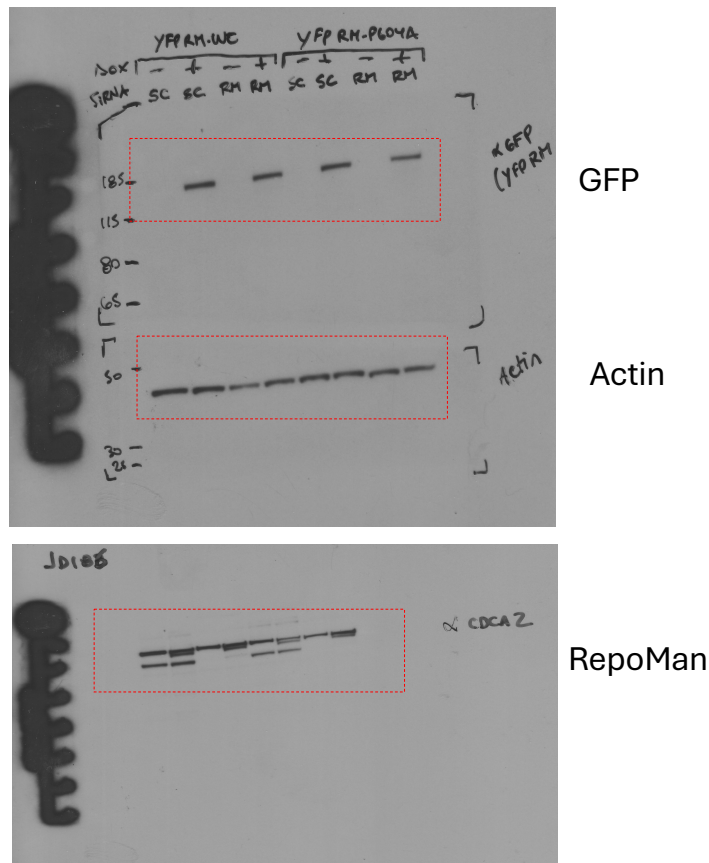

Figure 5E: Same membrane was developed first with GFP antibody and then with CDCA2 Antibody (Repoman)
