# Supplementary material for: PHD1-dependent hydroxylation of RepoMan (CDCA2) on P604 modulates the control of mitotic progression
Source: eLife journal article supplement (doi:10.7554/elife.108131), 2025-08-15
Supplement: fig5-data4 [file elife-108131-fig5-data4-v1.pdf]

Figure 5 - source data 4

**Table A**

| WT       | P604A    |
|----------|----------|
| 0.382013 | 0.184494 |
| 2.845382 | 0.113131 |
| 1.653171 | 0.040809 |
| 3.025067 | 0.628805 |
| 1.367205 | 0.88311  |
| 0.149512 | 0.257074 |
| 0.575781 | 0.201758 |
| 0.333396 | 0.685549 |
| 0.790974 | 0.422058 |
|          | 0.231086 |
| 0.700443 | 0.25443  |
| 0.947364 | -0.01204 |
| 1.895165 | 0.082602 |
| -0.02585 | 0.91483  |
| 0.217984 | 0.88787  |
| 1.438983 | 0.522494 |
| 0.472651 | 1.118349 |
| 1.558113 | 0.358472 |
| 0.236114 | 0.126145 |
| 0.436534 | 0.935984 |
| 0.9181   | 0.159838 |
| 1.671529 | 1.158703 |
|          | 0.568616 |
| 1.085211 | 0.381152 |
| 0.929098 | 0.943291 |
| 1.158373 | 0.319277 |
| 0.942487 | -0.1416  |
| 0.729352 | 1.15168  |
| 0.373    | 0.278449 |
| 0.445106 | 0.070144 |
| 0.803031 | 0.03269  |
| 0.480444 | 0.94049  |
| 0.991068 | 0.319211 |
| 0.893874 | -0.04565 |
| 0.514129 | 0.297062 |
| 1.04877  | 0.222379 |
| 0.686824 | 1.169893 |
| 0.489827 | 0.811418 |
| 3.160283 | 0.391603 |
| 1.679494 | 0.868989 |

|           |       |
|-----------|-------|
| 1.845755  | 1.792 |
| 0.4644992 | 2.044 |
| 1.7726898 | 1.24  |
| 0.8452043 | -0.17 |
| 2.5988323 | 0.197 |
| 0.3677532 | 0.242 |
| 0.1350568 | 0.932 |
| 0.8085126 | -0.33 |
| 1.0550522 | 0.206 |
| 0.7116502 | 0.013 |
| 1.1589974 | 0.031 |
| 0.3708741 | 0.334 |
| 0.6728299 | 0.519 |
| 1.0454919 | 2.511 |
| 2.0041091 | -0.06 |
| 0.3443329 | -0.11 |
| 0.7734894 | 0.139 |
| 1.7544757 | 0.159 |
| 1.1146317 | 0.708 |
| 0.1557624 | 0.552 |

**Table B**

| WT       | P604A    |
|----------|----------|
| 1118.768 | 1615.953 |
| 1825.518 | 2166.74  |
| 2156.714 | 731.062  |
| 1693.546 | 2510.669 |
| 1505.566 | 1881.175 |
| 3023.273 | 2301.058 |
| 1765.134 | 2114.603 |
| 1559.032 | 2509.984 |
| 1438.412 | 2418.294 |
|          | 1964.355 |
| 1606.799 | 2485.96  |
| 2226.264 | 4285.482 |
| 3105.972 | 1621.018 |
| 464.048  | 3985.764 |
| 797.5    | 4613.297 |
| 2938.802 | 3424.226 |
| 1334.173 | 5126.46  |

|          |          |
|----------|----------|
| 3302.518 | 3332.136 |
| 2157.601 | 794.839  |
| 2054.811 | 5497.501 |
| 1420.253 | 2067.607 |
| 5849.461 | 2151.314 |
|          | 2353.464 |
| 2826.938 | 1909.35  |
| 45.301   | 6591.143 |
| 3172.94  | 4537.455 |
| 3423.323 | 2573.254 |
| 2097.455 | 4998.547 |
| 3560.296 | 5122.853 |
| 4757.717 | 3886.582 |
| 1157.545 | 4192.674 |
| 3717.204 | 2825.341 |
| 2880.673 | 6262.861 |
| 6605.251 | 3998.237 |
| 3689.002 | 2098.319 |
| 4658.459 | 3485.436 |
| 3794.681 | 1914.516 |
| 5326.024 | 3239.928 |
| 4768.19  | 880.926  |
| 3618.472 | 3735.652 |
| 5573.448 | 2610.298 |
| 1859.619 | 468.609  |
| 3686.765 | 1005.197 |
| 3458.858 | 2245.288 |
| 2842.168 | 2389.238 |
| 1446.327 | 2170.969 |
| 3735.933 | 4066.413 |
| 6736.537 | 1194.509 |
| 3720.538 | 2666.717 |
| 6609.468 | 2227.699 |
| 4615.945 | 3336.706 |
| 4033.608 | 5803.401 |
| 1713.346 | 714.227  |
| 2895.878 | 524.309  |
| 1646.284 | 2913.716 |
| 6637.744 | 1908.486 |
| 4327.121 | 2890.513 |
| 1228.222 | 3844.408 |
| 4642.506 | 1948.642 |
| 4481.239 | 2650.3   |
