# Supplementary material for: PHD1-dependent hydroxylation of RepoMan (CDCA2) on P604 modulates the control of mitotic progression
Source: eLife journal article supplement (doi:10.7554/elife.108131), 2025-08-15

Figure 5- figure supplement 3\_source data 2

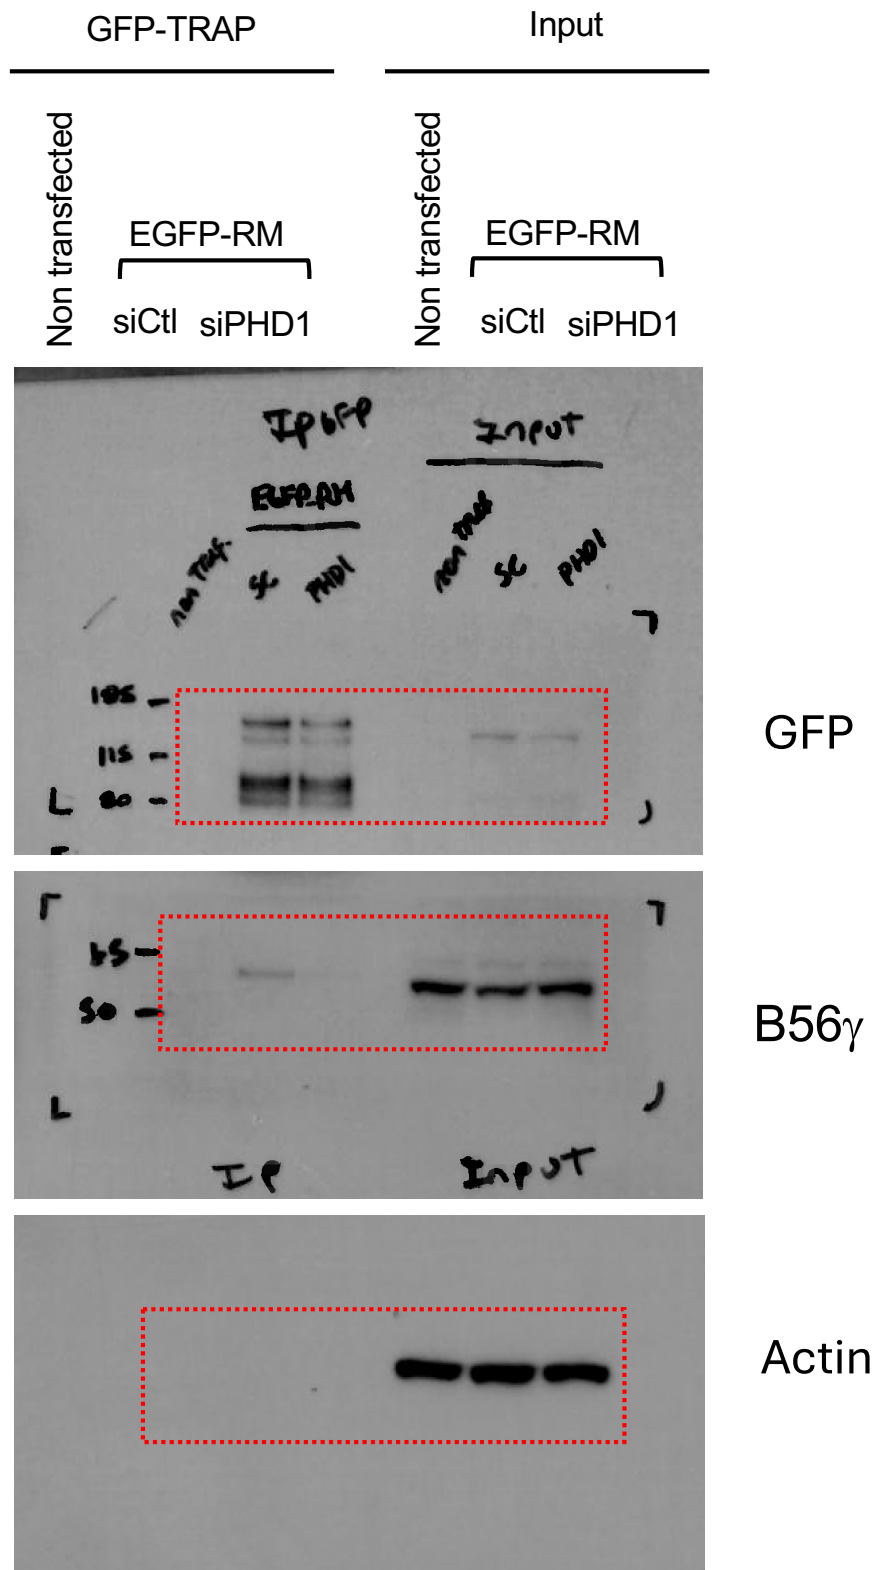

Supplement: fig5-figsupp3-data2 [file elife-108131-fig5-figsupp3-data2-v1.pdf]
