# Supplementary material for: PHD1-dependent hydroxylation of RepoMan (CDCA2) on P604 modulates the control of mitotic progression
Source: eLife journal article supplement (doi:10.7554/elife.108131), 2025-08-15
Supplement: fig6-data1 [file elife-108131-fig6-data1-v1.pdf]

Figure 6 -source data 1

| Experiment | condition | Number of unaligned bipolar cells | Number of aligned bipolar cells | Number of total bipolar cells | % unaligned bipolar cells | % aligned bipolar cells |
|------------|-----------|-----------------------------------|---------------------------------|-------------------------------|---------------------------|-------------------------|
| 1          | CtL       | 39                                | 43                              | 82                            | 47.56097561               | 52.43902439             |
|            | WT        | 53                                | 36                              | 89                            | 59.5505618                | 40.4494382              |
|            | P604A     | 60                                | 19                              | 79                            | 75.94936709               | 24.05063291             |
| 2          | CtL       | 32                                | 46                              | 78                            | 41.02564103               | 58.97435897             |
|            | WT        | 38                                | 40                              | 78                            | 48.71794872               | 51.28205128             |
|            | P604A     | 63                                | 17                              | 80                            | 78.75                     | 21.25                   |
| 3          | WT        | 15                                | 14                              | 29                            | 51.72413793               | 48.27586207             |
|            | P604A     | 19                                | 9                               | 28                            | 67.85714286               | 32.14285714             |
