# Supplementary material for: PHD1-dependent hydroxylation of RepoMan (CDCA2) on P604 modulates the control of mitotic progression
Source: eLife journal article supplement (doi:10.7554/elife.108131), 2025-08-15
Supplement: fig6-data2 [file elife-108131-fig6-data2-v1.pdf]

Figure 6- source data 2

| <b>Experiment</b> |                             | <b>RepoMan-WT</b> | <b>RepoMan-P604A</b> |
|-------------------|-----------------------------|-------------------|----------------------|
| <b>1</b>          | <b>Total cells</b>          | 23                | 18                   |
|                   | <b>Defects (n of cells)</b> | 6                 | 10                   |
|                   | <b>Normal (n of cells)</b>  | 17                | 8                    |
|                   | <b>%Defects</b>             | 26.08695652       | 55.55555556          |
|                   | <b>%Normal</b>              | 73.91304348       | 44.44444444          |
|                   |                             |                   |                      |
| <b>2</b>          | <b>Total cells</b>          | 15                | 16                   |
|                   | <b>Defects (n of cells)</b> | 5                 | 10                   |
|                   | <b>Normal (n of cells)</b>  | 10                | 6                    |
|                   | <b>%Defects</b>             | 33.33333333       | 62.5                 |
|                   | <b>%Normal</b>              | 66.66666667       | 37.5                 |
|                   |                             |                   |                      |
| <b>3</b>          | <b>Total cells</b>          | 19                | 21                   |
|                   | <b>Defects (n of cells)</b> | 3                 | 11                   |
|                   | <b>Normal (n of cells)</b>  | 16                | 10                   |
|                   | <b>%Defects</b>             | 15.78947368       | 52.38095238          |
|                   | <b>%Normal</b>              | 84.21052632       | 47.61904762          |
|                   |                             |                   |                      |
