# Supplementary material for: PHD1-dependent hydroxylation of RepoMan (CDCA2) on P604 modulates the control of mitotic progression
Source: eLife. 2026 Jun 25;14:RP108131. doi: 10.7554/eLife.108131 (PMC13299607; doi:10.7554/eLife.108131)
Supplement: Figure 5—source data 3. [file elife-108131-fig5-data3.xlsx]

## Sheet: Description
Table with the ScanR data represented in panel B of Figure 5. In the columns the total intensity DAPI, the SUM of the foci intensity and the number of the PLA foci are shown for each cell in the asynchronous conditions and cells arrested with monastrol. The number of PLA foci per cell correspond with the figure in panel B.
All the data shown correspond with single cells that are positive for the phSer signal.
Data from the colunm in yellow are represented in panel B.

## Sheet: panel B
Object ID	Row	Column	Total Intensity DAPI	PLA foci Counts	SUMtotalINTfoci
18898	Monastrol	Control	91520240	0	0
18962	Monastrol	Control	97864224	2	136462
18978	Monastrol	Control	91704048	0	0
19004	Monastrol	Control	119773920	55	1274086
19010	Monastrol	Control	39766912	15	566238
19101	Monastrol	Control	87173432	9	264536
19108	Monastrol	Control	44842720	1	24129
19116	Monastrol	Control	49083072	7	150716
19129	Monastrol	Control	81063952	5	120573
19135	Monastrol	Control	45262616	4	112983
19148	Monastrol	Control	97219344	6	274691
19151	Monastrol	Control	88056824	6	143378
19156	Monastrol	Control	81859184	5	113724
19180	Monastrol	Control	96352744	6	303851
19188	Monastrol	Control	59440172	2	43017
19266	Monastrol	Control	61143972	13	267393
19280	Monastrol	Control	78105432	17	392509
19287	Monastrol	Control	71568464	11	348392
19296	Monastrol	Control	103262400	28	966972
19307	Monastrol	Control	79228944	17	474428
19308	Monastrol	Control	82883864	6	238546
19351	Monastrol	Control	90409808	25	649568
19387	Monastrol	Control	78451456	9	330750
19410	Monastrol	Control	77592680	11	318091
19416	Monastrol	Control	79461176	2	222607
19417	Monastrol	Control	85238568	6	270522
19463	Monastrol	Control	73863320	12	321899
19479	Monastrol	Control	82485888	11	310036
19501	Monastrol	Control	51116856	16	608411
19513	Monastrol	Control	87130728	27	899316
19594	Monastrol	Control	84732960	40	1413960
19599	Monastrol	Control	99800032	15	367556
19605	Monastrol	Control	105436390	16	573897
19620	Monastrol	Control	125287050	12	249927
19635	Monastrol	Control	83174704	21	800335
19651	Monastrol	Control	85517536	14	318956
19673	Monastrol	Control	95490360	12	433940
19710	Monastrol	Control	100208830	7	198306
19754	Monastrol	Control	96540752	4	154583
19756	Monastrol	Control	91056104	7	245638
19759	Monastrol	Control	35625108	9	198710
19762	Monastrol	Control	85309992	4	66339002
19764	Monastrol	Control	22381416	5	93013
19767	Monastrol	Control	87952184	22	494372
19781	Monastrol	Control	73026256	21	611886
19784	Monastrol	Control	108977330	13	362496
19800	Monastrol	Control	92880072	6	235365
19826	Monastrol	Control	94336528	8	272432
19844	Monastrol	Control	101203880	1	18319
19919	Monastrol	Control	78298064	26	727176
19952	Monastrol	Control	91619232	42	1911288
19959	Monastrol	Control	94547312	34	1127330
19970	Monastrol	Control	124584370	31	888654
19972	Monastrol	Control	76139616	10	293808
19992	Monastrol	Control	60774240	11	296591
20064	Monastrol	Control	76052824	17	421547
20097	Monastrol	Control	62408268	13	323874
20098	Monastrol	Control	77670880	7	187386
20113	Monastrol	Control	98661488	1	21595
20136	Monastrol	Control	88603816	7	198529
20219	Monastrol	Control	89163272	0	0
20275	Monastrol	Control	99173912	5	106734
20348	Monastrol	Control	76120464	26	730958
20382	Monastrol	Control	56885800	9	229691
20407	Monastrol	Control	87362872	14	329379
20413	Monastrol	Control	70240408	7	154613
20419	Monastrol	Control	76537520	17	527411
20426	Monastrol	Control	77878136	17	402817
20433	Monastrol	Control	67329784	19	432351
20443	Monastrol	Control	73137224	4	124477
20473	Monastrol	Control	84620760	9	282920
20497	Monastrol	Control	54913856	6	177878
20502	Monastrol	Control	78355200	22	786115
20520	Monastrol	Control	71420424	17	414716
20533	Monastrol	Control	89886232	36	1117606
20552	Monastrol	Control	99865184	27	840317
20575	Monastrol	Control	84146632	4	106024
20606	Monastrol	Control	92974200	27	690987
20657	Monastrol	Control	87940424	50	1170221
20715	Monastrol	Control	41680588	2	42730
20723	Monastrol	Control	133615970	10	309852
20854	Monastrol	Control	68436592	3	83691
20858	Monastrol	Control	130514420	9	261719
20906	Monastrol	Control	66614332	9	229065
20919	Monastrol	Control	107325220	17	425157
20930	Monastrol	Control	121570440	21	612703
20931	Monastrol	Control	388731	8	96467
20943	Monastrol	Control	83504984	9	313560
20944	Monastrol	Control	74568616	35	960858
20949	Monastrol	Control	37337388	11	332832
20958	Monastrol	Control	70166664	21	637336
20960	Monastrol	Control	75627056	23	654743
21010	Monastrol	Control	86761832	17	438351
21018	Monastrol	Control	88206312	7	254622
21022	Monastrol	Control	40507272	23	510893
21032	Monastrol	Control	38039852	5	140482
21040	Monastrol	Control	91567280	3	161957
21043	Monastrol	Control	103571250	5	234483
21067	Monastrol	Control	127419850	8	281943
21107	Monastrol	Control	87836312	5	158485
21127	Monastrol	Control	87838744	4	184068
21152	Monastrol	Control	108197620	11	275469
21166	Monastrol	Control	74506944	3	77386
21246	Monastrol	Control	83827768	28	644203
21320	Monastrol	Control	89525024	9	301377
21401	Monastrol	Control	66104916	15	375595
21402	Monastrol	Control	60285160	19	445695
21432	Monastrol	Control	57238276	7	147665
21452	Monastrol	Control	64039868	6	173642
21504	Monastrol	Control	112361180	3	188550
21554	Monastrol	Control	70492800	14	346654
21564	Monastrol	Control	68488664	16	463916
21577	Monastrol	Control	101142730	4	108179
21612	Monastrol	Control	61533260	22	586016
21630	Monastrol	Control	42708508	6	157803
21632	Monastrol	Control	90144136	3	64653
21687	Monastrol	Control	43420080	9	200464
21688	Monastrol	Control	40499644	21	423318
21695	Monastrol	Control	79376064	10	308085
21698	Monastrol	Control	74477264	14	492145
21699	Monastrol	Control	24559106	8	161393
21754	Monastrol	Control	79687120	32	950165
21765	Monastrol	Control	86998136	16	424529
21932	Monastrol	Control	87493432	12	543290
21995	Monastrol	Control	82652312	13	406516
22048	Monastrol	Control	107923260	42	1858763
22060	Monastrol	Control	108053550	8	382686
22072	Monastrol	Control	121874190	21	818136
22102	Monastrol	Control	102633510	18	763435
22104	Monastrol	Control	83484920	20	545178
22129	Monastrol	Control	86815824	49	2211471
22142	Monastrol	Control	108377660	20	699225
22168	Monastrol	Control	103651060	17	666585
22186	Monastrol	Control	84325832	17	610231
22190	Monastrol	Control	91765936	44	1215933
22192	Monastrol	Control	104694480	21	849189
22194	Monastrol	Control	91432944	33	1061307
22216	Monastrol	Control	85701872	11	343940
22221	Monastrol	Control	104053050	13	356117
22236	Monastrol	Control	63756776	9	190190
22248	Monastrol	Control	103064770	48	1349644
22265	Monastrol	Control	79718264	10	249733
22275	Monastrol	Control	84039928	36	946744
22291	Monastrol	Control	62122988	21	504622
22329	Monastrol	Control	101052700	14	357386
22344	Monastrol	Control	89043584	15	375106
22354	Monastrol	Control	63092588	2	75887
22409	Monastrol	Control	100843260	16	452915
22430	Monastrol	Control	82970320	6	139104
22435	Monastrol	Control	47246396	7	152987
22473	Monastrol	Control	82057616	22	586231
22484	Monastrol	Control	65701488	5	136246
22510	Monastrol	Control	92280312	1	35457
22529	Monastrol	Control	39394072	4	127201
22534	Monastrol	Control	98839568	5	216110
22568	Monastrol	Control	65174952	10	229457
22681	Monastrol	Control	79027912	1	18196
22683	Monastrol	Control	85474448	2	39822
22703	Monastrol	Control	80124672	5	117233
22720	Monastrol	Control	80305648	0	0
22723	Monastrol	Control	72740024	0	0
22725	Monastrol	Control	92610912	0	0
22745	Monastrol	Control	63426484	0	0
22756	Monastrol	Control	59840536	0	0
22759	Monastrol	Control	89030256	0	0
22795	Monastrol	Control	64324428	7	148804
22819	Monastrol	Control	86873488	4	107069
22823	Monastrol	Control	65946788	18	407112
22841	Monastrol	Control	91504304	14	368823
22844	Monastrol	Control	109163890	14	502276
22845	Monastrol	Control	116907450	4	101790
22859	Monastrol	Control	106295580	8	252744
22879	Monastrol	Control	65784672	10	284478
22882	Monastrol	Control	106179560	30	965258
22905	Monastrol	Control	91923024	5	132061
22906	Monastrol	Control	97927960	3	190013.99
22922	Monastrol	Control	75736856	17	484754
22931	Monastrol	Control	72770536	9	228787
22935	Monastrol	Control	65857088	7	166442
22960	Monastrol	Control	54607320	5	126979
22995	Monastrol	Control	69337328	4	109405
23034	Monastrol	Control	107424180	12	368861
23045	Monastrol	Control	77674256	4	124342
23070	Monastrol	Control	67686688	21	562907
23088	Monastrol	Control	67319952	0	0
23134	Monastrol	Control	108787100	7	131540
23230	Monastrol	Control	99582672	18	626702
23261	Monastrol	Control	97026888	0	0
23277	Monastrol	Control	86734096	6	168739
23349	Monastrol	Control	83791096	6	235345
23376	Monastrol	Control	76323208	6	157039
23395	Monastrol	Control	95812976	11	389986
23406	Monastrol	Control	76545960	24	559819
23409	Monastrol	Control	97903288	12	310582
23415	Monastrol	Control	113328390	18	456070
23425	Monastrol	Control	60643696	9	219288
23448	Monastrol	Control	140201100	21	661886.99
23512	Monastrol	Control	105517180	23	913622
23548	Monastrol	Control	76564704	25	827061
23590	Monastrol	Control	105201650	34	1484870
23694	Monastrol	Control	85512688	2	50504
23719	Monastrol	Control	104293040	17	488725
23735	Monastrol	Control	49971712	7	164612
23750	Monastrol	Control	103327470	8	185261
23752	Monastrol	Control	76640664	19	422686
23762	Monastrol	Control	78145104	1	70175
23764	Monastrol	Control	79552288	10	272496
23767	Monastrol	Control	67497520	7	114951
23784	Monastrol	Control	95082112	10	212706
23787	Monastrol	Control	79248440	48	1371047
23808	Monastrol	Control	71391184	57	1187154
23836	Monastrol	Control	17943788	4	68538
23844	Monastrol	Control	71663024	3	60490
23920	Monastrol	Control	74191768	33	667462
23932	Monastrol	Control	76986512	0	0
23973	Monastrol	Control	47277312	3	50279
24022	Monastrol	Control	82862312	18	437313
24024	Monastrol	Control	91733000	24	628342
24065	Monastrol	Control	104221000	0	0
24070	Monastrol	Control	94066256	3	112060
24118	Monastrol	Control	97892784	13	596839
24215	Monastrol	Control	90196752	0	0
24251	Monastrol	Control	65285120	6	189182
24259	Monastrol	Control	54705972	0	0
24279	Monastrol	Control	61162912	16	346883
24311	Monastrol	Control	65353004	12	382163
24347	Monastrol	Control	104583660	12	519636.01
24351	Monastrol	Control	28379762	4	91711
24353	Monastrol	Control	28326092	3	68877
24397	Monastrol	YFP-RM-WT	91285608	26	1577763
24407	Monastrol	YFP-RM-WT	62534508	12	357099
24416	Monastrol	YFP-RM-WT	98254280	30	1684831
24421	Monastrol	YFP-RM-WT	99149576	36	1773924
24443	Monastrol	YFP-RM-WT	251584	18	308089
24494	Monastrol	YFP-RM-WT	39327996	11	465674
24495	Monastrol	YFP-RM-WT	77164616	38	2015977
24538	Monastrol	YFP-RM-WT	77624488	26	972319
24575	Monastrol	YFP-RM-WT	98217536	37	1766340
24582	Monastrol	YFP-RM-WT	88993224	18	753644
24583	Monastrol	YFP-RM-WT	79408680	28	1054191
24586	Monastrol	YFP-RM-WT	41653140	11	531233
24588	Monastrol	YFP-RM-WT	29130512	7	221550
24602	Monastrol	YFP-RM-WT	77521048	23	762997
24620	Monastrol	YFP-RM-WT	94223080	47	2150762
24625	Monastrol	YFP-RM-WT	78392712	28	1201081
24645	Monastrol	YFP-RM-WT	89950728	18	955068
24651	Monastrol	YFP-RM-WT	33706264	24	1394134
24679	Monastrol	YFP-RM-WT	100986580	23	1473829
24709	Monastrol	YFP-RM-WT	32366368	6	196915
24712	Monastrol	YFP-RM-WT	17570888	1	38805
24762	Monastrol	YFP-RM-WT	135951740	30	976456
24765	Monastrol	YFP-RM-WT	75987888	25	1684292
24775	Monastrol	YFP-RM-WT	91015880	36	2682421
24874	Monastrol	YFP-RM-WT	57408304	20	659726
24889	Monastrol	YFP-RM-WT	84736136	34	1565403
24954	Monastrol	YFP-RM-WT	66234504	6	252744
24968	Monastrol	YFP-RM-WT	107498780	13	698114
25014	Monastrol	YFP-RM-WT	97634368	46	3003509
25056	Monastrol	YFP-RM-WT	50318148	24	643435
25079	Monastrol	YFP-RM-WT	93170176	19	728820
25101	Monastrol	YFP-RM-WT	93499800	28	1160479
25127	Monastrol	YFP-RM-WT	73387792	13	476796
25145	Monastrol	YFP-RM-WT	124448470	23	724864
25182	Monastrol	YFP-RM-WT	80386248	28	1461218
25185	Monastrol	YFP-RM-WT	111847680	28	1528918
25202	Monastrol	YFP-RM-WT	73613288	26	1055956
25207	Monastrol	YFP-RM-WT	69818704	18	1076749
25266	Monastrol	YFP-RM-WT	76472376	35	1583217
25281	Monastrol	YFP-RM-WT	90387152	44	2138014
25350	Monastrol	YFP-RM-WT	71890280	11	368320
25359	Monastrol	YFP-RM-WT	78008960	31	1099539
25374	Monastrol	YFP-RM-WT	55769928	15	506317
25375	Monastrol	YFP-RM-WT	70009016	11	586383
25406	Monastrol	YFP-RM-WT	77313568	64	2142660
25448	Monastrol	YFP-RM-WT	85531128	18	668320
25452	Monastrol	YFP-RM-WT	87756152	38	1391795
25464	Monastrol	YFP-RM-WT	84400792	27	1037498
25468	Monastrol	YFP-RM-WT	77865968	58	2233544
25480	Monastrol	YFP-RM-WT	97807056	61	3593083
25498	Monastrol	YFP-RM-WT	87148960	34	933394
25533	Monastrol	YFP-RM-WT	77698536	15	576518
25556	Monastrol	YFP-RM-WT	103982660	27	1553613
25560	Monastrol	YFP-RM-WT	93858400	17	857420
25561	Monastrol	YFP-RM-WT	78203232	21	772515
25604	Monastrol	YFP-RM-WT	77384328	18	471725
25620	Monastrol	YFP-RM-WT	93332920	32	1364562
25629	Monastrol	YFP-RM-WT	96308144	18	731787
25727	Monastrol	YFP-RM-WT	79231152	34	1752848
25731	Monastrol	YFP-RM-WT	53974120	23	1055284
25762	Monastrol	YFP-RM-WT	60388376	24	962319.01
25769	Monastrol	YFP-RM-WT	65308960	41	1266409
25788	Monastrol	YFP-RM-WT	99287424	42	2719299
25810	Monastrol	YFP-RM-WT	96952688	25	1015853
25811	Monastrol	YFP-RM-WT	88675608	20	1028996
25834	Monastrol	YFP-RM-WT	100235670	36	2180646
25857	Monastrol	YFP-RM-WT	74183368	27	1626743
25870	Monastrol	YFP-RM-WT	40697512	15	929414
25873	Monastrol	YFP-RM-WT	40437620	14	686138
25894	Monastrol	YFP-RM-WT	74815680	24	764162
25911	Monastrol	YFP-RM-WT	82856896	29	1679356
25940	Monastrol	YFP-RM-WT	74844592	38	1552327
25948	Monastrol	YFP-RM-WT	55334656	30	1011201
25956	Monastrol	YFP-RM-WT	78142984	9	437025
25973	Monastrol	YFP-RM-WT	70972240	24	856527
26005	Monastrol	YFP-RM-WT	33931516	5	166166
26006	Monastrol	YFP-RM-WT	28287934	2	51455
26034	Monastrol	YFP-RM-WT	57600932	8	200676
26057	Monastrol	YFP-RM-WT	99321624	14	542434
26073	Monastrol	YFP-RM-WT	88470032	25	1040262
26093	Monastrol	YFP-RM-WT	95371568	16	710506
26125	Monastrol	YFP-RM-WT	89338904	29	1218248
26144	Monastrol	YFP-RM-WT	128566640	19	665074
26153	Monastrol	YFP-RM-WT	43598360	12	422793
26161	Monastrol	YFP-RM-WT	35018068	11	253842
26190	Monastrol	YFP-RM-WT	99261592	17	1258994
26207	Monastrol	YFP-RM-WT	86508368	17	483572
26226	Monastrol	YFP-RM-WT	75299560	35	1210147
26255	Monastrol	YFP-RM-WT	85604240	16	611343
26266	Monastrol	YFP-RM-WT	75321176	38	1648222
26271	Monastrol	YFP-RM-WT	90339712	41	2091234
26293	Monastrol	YFP-RM-WT	94958400	35	1419508
26311	Monastrol	YFP-RM-WT	124664050	33	1270253
26313	Monastrol	YFP-RM-WT	31218446	18	746898
26335	Monastrol	YFP-RM-WT	87794680	59	2374725
26413	Monastrol	YFP-RM-WT	71549952	46	1856173
26415	Monastrol	YFP-RM-WT	49823124	9	306775
26430	Monastrol	YFP-RM-WT	68463328	18	743735
26443	Monastrol	YFP-RM-WT	87372976	25	1116769
26472	Monastrol	YFP-RM-WT	88768504	39	1930717
26478	Monastrol	YFP-RM-WT	78294672	19	630307
26514	Monastrol	YFP-RM-WT	81701992	57	3494825
26517	Monastrol	YFP-RM-WT	64299392	31	1014038
26531	Monastrol	YFP-RM-WT	84949168	63	3549647
26538	Monastrol	YFP-RM-WT	62134956	43	1359810
26560	Monastrol	YFP-RM-WT	82902680	10	366990
26588	Monastrol	YFP-RM-WT	70342248	23	971879.99
26611	Monastrol	YFP-RM-WT	44192560	7	261823
26631	Monastrol	YFP-RM-WT	95754056	33	2071177
26653	Monastrol	YFP-RM-WT	65229476	34	989924
26685	Monastrol	YFP-RM-WT	79248096	31	1166798
26700	Monastrol	YFP-RM-WT	95498176	27	849355
26701	Monastrol	YFP-RM-WT	98939304	25	1074765
26739	Monastrol	YFP-RM-WT	44619464	32	1175378
26740	Monastrol	YFP-RM-WT	70434680	31	1016749
26742	Monastrol	YFP-RM-WT	28874066	16	505006
26744	Monastrol	YFP-RM-WT	68116152	25	1014562
26747	Monastrol	YFP-RM-WT	79990528	35	1357859
26748	Monastrol	YFP-RM-WT	64787400	36	1163432
26750	Monastrol	YFP-RM-WT	36865116	32	905623
26751	Monastrol	YFP-RM-WT	76851512	18	991978
26752	Monastrol	YFP-RM-WT	140840720	47	2434051
26755	Monastrol	YFP-RM-WT	82370040	31	1235271
26756	Monastrol	YFP-RM-WT	53090516	33	964045
26764	Monastrol	YFP-RM-WT	86234408	20	960275
26771	Monastrol	YFP-RM-WT	83157704	16	611724
26783	Monastrol	YFP-RM-WT	32174302	8	222404
26786	Monastrol	YFP-RM-WT	98139336	21	1730705
26787	Monastrol	YFP-RM-WT	34337080	21	779629
26795	Monastrol	YFP-RM-WT	74645888	18	720222.01
26798	Monastrol	YFP-RM-WT	81993104	21	1020396
26803	Monastrol	YFP-RM-WT	118693240	18	743656
26804	Monastrol	YFP-RM-WT	30292554	8	199907
26807	Monastrol	YFP-RM-WT	79568632	24	980416
26809	Monastrol	YFP-RM-WT	71538400	38	1674446
26825	Monastrol	YFP-RM-WT	29686758	11	422318
26829	Monastrol	YFP-RM-WT	82889680	19	1011690
26830	Monastrol	YFP-RM-WT	70912864	48	1564537
26831	Monastrol	YFP-RM-WT	85946952	37	1810902
26839	Monastrol	YFP-RM-WT	83788456	16	692504
26840	Monastrol	YFP-RM-WT	78919112	20	1017001
26841	Monastrol	YFP-RM-WT	81121736	23	991616
26845	Monastrol	YFP-RM-WT	59642824	33	1545343
26849	Monastrol	YFP-RM-WT	82842304	29	1340729
26850	Monastrol	YFP-RM-WT	64034840	32	1754480
26852	Monastrol	YFP-RM-WT	65090176	17	757126
26856	Monastrol	YFP-RM-WT	74764736	22	809100.99
26858	Monastrol	YFP-RM-WT	45349212	14	361199
26859	Monastrol	YFP-RM-WT	44752212	12	371838
26902	Monastrol	YFP-RM-WT	82068632	24	1217182
26903	Monastrol	YFP-RM-WT	64991320	20	1039343
26904	Monastrol	YFP-RM-WT	66110612	16	690562
26911	Monastrol	YFP-RM-WT	81613280	27	1677007
26912	Monastrol	YFP-RM-WT	70869088	25	1344874
26920	Monastrol	YFP-RM-WT	74461696	47	2801217
26938	Monastrol	YFP-RM-WT	96077000	53	2805408
26967	Monastrol	YFP-RM-WT	69665112	17	601034
26981	Monastrol	YFP-RM-WT	75487640	39	1904767
26995	Monastrol	YFP-RM-WT	85399472	20	1056156
26998	Monastrol	YFP-RM-WT	99357960	38	2748663
27026	Monastrol	YFP-RM-WT	59359916	20	701775
27033	Monastrol	YFP-RM-WT	85867656	35	2368904
27046	Monastrol	YFP-RM-WT	79045472	21	1559013
27048	Monastrol	YFP-RM-WT	77987448	62	2598168
27050	Monastrol	YFP-RM-WT	69534960	19	553204
27062	Monastrol	YFP-RM-WT	86963560	24	1164959
27074	Monastrol	YFP-RM-WT	70870336	41	1532897
27081	Monastrol	YFP-RM-WT	79101984	7	288162
27088	Monastrol	YFP-RM-WT	76411568	21	1014795
27113	Monastrol	YFP-RM-WT	83992008	25	994936
27144	Monastrol	YFP-RM-WT	56764580	19	666427
27197	Monastrol	YFP-RM-WT	82399632	19	883327
27207	Monastrol	YFP-RM-WT	76615672	12	327768
27229	Monastrol	YFP-RM-WT	73345136	18	585348
27243	Monastrol	YFP-RM-WT	58794852	8	239348
27257	Monastrol	YFP-RM-WT	84362576	16	739921
27296	Monastrol	YFP-RM-WT	50579424	8	227596
27328	Monastrol	YFP-RM-WT	84350448	29	1649222
27340	Monastrol	YFP-RM-WT	115101970	7	241636
27341	Monastrol	YFP-RM-WT	62245012	14	535419
27346	Monastrol	YFP-RM-WT	86857920	42	2428696
27347	Monastrol	YFP-RM-WT	29345418	12	369244
27349	Monastrol	YFP-RM-WT	63920840	26	1561561
27351	Monastrol	YFP-RM-WT	69642616	20	1090557
27353	Monastrol	YFP-RM-WT	101977750	16	595626
27354	Monastrol	YFP-RM-WT	84398096	21	1304434
27355	Monastrol	YFP-RM-WT	76277248	22	904440
27359	Monastrol	YFP-RM-WT	59573492	13	442025
27361	Monastrol	YFP-RM-WT	38523824	25	566817
27362	Monastrol	YFP-RM-WT	70816232	20	856624
27363	Monastrol	YFP-RM-WT	82386296	39	1629682
27365	Monastrol	YFP-RM-WT	30139430	26	779692
27366	Monastrol	YFP-RM-WT	95984472	40	1606401
27376	Monastrol	YFP-RM-WT	47370772	18	479494
27378	Monastrol	YFP-RM-WT	69790888	13	732708
27400	Monastrol	YFP-RM-WT	88191184	10	370316
27408	Monastrol	YFP-RM-WT	83833016	21	1105707
27455	Monastrol	YFP-RM-WT	85330400	20	1007264
27527	Monastrol	YFP-RM-WT	31351524	5	306163
27644	Monastrol	YFP-RM-WT	86121488	17	793801
27683	Monastrol	YFP-RM-WT	99689424	14	619865
27714	Monastrol	YFP-RM-WT	94568840	15	1310315
27739	Monastrol	YFP-RM-WT	75462312	12	460867
27791	Monastrol	YFP-RM-WT	93007368	50	3208242
27827	Monastrol	YFP-RM-WT	91117128	30	1971264
27829	Monastrol	YFP-RM-WT	83175744	33	1588389
27846	Monastrol	YFP-RM-WT	91853080	31	1842140
27851	Monastrol	YFP-RM-WT	94200376	43	2174029
27852	Monastrol	YFP-RM-WT	126711980	26	1680715
27859	Monastrol	YFP-RM-WT	71812144	14	535368
27885	Monastrol	YFP-RM-WT	98268880	28	1181802
27902	Monastrol	YFP-RM-WT	91531896	62	3309166
27916	Monastrol	YFP-RM-WT	123262620	31	1306113
27951	Monastrol	YFP-RM-WT	100463760	25	1237591
27987	Monastrol	YFP-RM-WT	76687096	26	737810
28011	Monastrol	YFP-RM-WT	100916740	37	1399804
28079	Monastrol	YFP-RM-WT	61022256	38	1083965
28092	Monastrol	YFP-RM-WT	82949072	13	471668
28120	Monastrol	YFP-RM-WT	76994384	15	788500
28141	Monastrol	YFP-RM-WT	97145232	68	2778964
28163	Monastrol	YFP-RM-WT	81683384	2	41252002
28176	Monastrol	YFP-RM-WT	87833104	41	2848852
28213	Monastrol	YFP-RM-WT	72026520	1	129004
28231	Monastrol	YFP-RM-WT	105493760	27	1944940
28269	Monastrol	YFP-RM-WT	74935976	24	775417
28317	Monastrol	YFP-RM-WT	90670856	39	1676419
28319	Monastrol	YFP-RM-WT	72054720	22	926036
28352	Monastrol	YFP-RM-WT	82221960	26	1560614
28356	Monastrol	YFP-RM-WT	72657392	21	601934
28358	Monastrol	YFP-RM-WT	42221036	17	375515
28360	Monastrol	YFP-RM-WT	53955384	12	338531
28386	Monastrol	YFP-RM-WT	79408208	15	586623
28419	Monastrol	YFP-RM-WT	63424980	13	508471
28425	Monastrol	YFP-RM-WT	65470836	13	443870
28432	Monastrol	YFP-RM-WT	93690824	46	2513535
28458	Monastrol	YFP-RM-WT	71617976	8	368159
28496	Monastrol	YFP-RM-WT	58055684	10	360668
28498	Monastrol	YFP-RM-WT	78532832	9	338870
28499	Monastrol	YFP-RM-WT	56697216	31	1214311
28540	Monastrol	YFP-RM-WT	62627488	27	917785
28600	Monastrol	YFP-RM-WT	76664104	18	724729
28603	Monastrol	YFP-RM-WT	78435584	20	1158488
28630	Monastrol	YFP-RM-WT	85444376	16	611360
28636	Monastrol	YFP-RM-WT	83356504	11	385582
28685	Monastrol	YFP-RM-WT	90669664	37	1731581
28694	Monastrol	YFP-RM-WT	87016488	7	362175
28725	Monastrol	YFP-RM-WT	80669680	28	1125259
28734	Monastrol	YFP-RM-WT	94965136	4	237243
28749	Monastrol	YFP-RM-WT	58642740	22	735717
28796	Monastrol	YFP-RM-WT	58620780	34	1155847
28826	Monastrol	YFP-RM-WT	71300352	20	822272
28871	Monastrol	YFP-RM-WT	110814940	45	2405404
28909	Monastrol	YFP-RM-WT	102016250	31	1693981
28919	Monastrol	YFP-RM-WT	101908660	38	1608734
28939	Monastrol	YFP-RM-WT	106377820	12	459959
28973	Monastrol	YFP-RM-WT	87762808	29	1022792
28995	Monastrol	YFP-RM-WT	88530200	35	1542960
28998	Monastrol	YFP-RM-WT	95746896	36	1414255
29008	Monastrol	YFP-RM-WT	79753880	17	580887
29042	Monastrol	YFP-RM-WT	90624392	25	1262106
29043	Monastrol	YFP-RM-WT	71053072	35	1623966
29052	Monastrol	YFP-RM-WT	78870320	21	725099
29054	Monastrol	YFP-RM-WT	36519188	12	700647.99
29062	Monastrol	YFP-RM-WT	83633488	26	1832080
29065	Monastrol	YFP-RM-WT	74853608	35	1379568
29085	Monastrol	YFP-RM-WT	111451470	62	2497673
29098	Monastrol	YFP-RM-WT	67727592	16	599234
29099	Monastrol	YFP-RM-WT	84235424	20	1219954
29102	Monastrol	YFP-RM-WT	77782736	10	363188
29107	Monastrol	YFP-RM-WT	75307520	10	453638
29108	Monastrol	YFP-RM-WT	89747768	12	369308
29110	Monastrol	YFP-RM-WT	45144672	10	406014
29123	Monastrol	YFP-RM-WT	71148440	27	1157887
29135	Monastrol	YFP-RM-WT	96956352	8	351456
29188	Monastrol	YFP-RM-WT	69993928	12	419788
29223	Monastrol	YFP-RM-WT	104709280	48	3361363
29231	Monastrol	YFP-RM-WT	83426392	15	561282
29285	Monastrol	YFP-RM-WT	91687888	59	2231126
29331	Monastrol	YFP-RM-WT	83412632	16	441177
29335	Monastrol	YFP-RM-WT	57981840	5	140613
29336	Monastrol	YFP-RM-WT	13074841	7	218493
29393	Monastrol	YFP-RM-WT	117751100	13	498031
29409	Monastrol	YFP-RM-WT	80645720	32	1939529
29474	Monastrol	YFP-RM-WT	90616264	40	1854386
29479	Monastrol	YFP-RM-WT	74958072	47	1663693
29509	Monastrol	YFP-RM-WT	72507864	39	1445951
29518	Monastrol	YFP-RM-WT	77047008	44	2062261
29528	Monastrol	YFP-RM-WT	77993792	30	1003507
29576	Monastrol	YFP-RM-WT	77219408	20	558937
29585	Monastrol	YFP-RM-WT	92552392	58	2895892
29634	Monastrol	YFP-RM-WT	89865728	37	2139943
29683	Monastrol	YFP-RM-WT	83629192	21	997344
29694	Monastrol	YFP-RM-WT	84383392	14	679280.99
29792	Monastrol	YFP-RM-WT	42901588	18	1101674
29859	Monastrol	YFP-RM-WT	84137720	60	2796305
29862	Monastrol	YFP-RM-WT	67558216	15	510568
29895	Monastrol	YFP-RM-WT	117656440	4	171365
29919	Monastrol	YFP-RM-WT	72639056	13	699526
29944	Monastrol	YFP-RM-WT	92743408	27	1415461
29949	Monastrol	YFP-RM-WT	99822920	31	1457664
29958	Monastrol	YFP-RM-WT	86490488	30	1147202
30006	Monastrol	YFP-RM-P604A	114207830	18	978999
30015	Monastrol	YFP-RM-P604A	85937400	28	1176047
30018	Monastrol	YFP-RM-P604A	106728780	19	853508.01
30050	Monastrol	YFP-RM-P604A	88622680	23	1000809
30060	Monastrol	YFP-RM-P604A	95683336	19	1726850
30061	Monastrol	YFP-RM-P604A	128107360	7	326422
30099	Monastrol	YFP-RM-P604A	101798530	40	2524567
30127	Monastrol	YFP-RM-P604A	83306696	30	1176575
30160	Monastrol	YFP-RM-P604A	123979220	42	3276598
30161	Monastrol	YFP-RM-P604A	84350256	8	483716
30197	Monastrol	YFP-RM-P604A	45708624	14	412632
30214	Monastrol	YFP-RM-P604A	70623464	29	1144704
30222	Monastrol	YFP-RM-P604A	112824550	14	890653
30223	Monastrol	YFP-RM-P604A	97620936	14	691867
30231	Monastrol	YFP-RM-P604A	101351640	21	898955
30233	Monastrol	YFP-RM-P604A	102934100	22	1148921
30234	Monastrol	YFP-RM-P604A	79802552	13	602591
30265	Monastrol	YFP-RM-P604A	88326720	11	387399
30281	Monastrol	YFP-RM-P604A	110484660	24	1164987
30303	Monastrol	YFP-RM-P604A	109045120	20	826452
30318	Monastrol	YFP-RM-P604A	76738736	18	769821
30351	Monastrol	YFP-RM-P604A	81527352	49	2704791
30384	Monastrol	YFP-RM-P604A	115291730	13	472959
30451	Monastrol	YFP-RM-P604A	91237176	35	1928126
30454	Monastrol	YFP-RM-P604A	76537200	13	362128
30460	Monastrol	YFP-RM-P604A	53237936	20	379507
30464	Monastrol	YFP-RM-P604A	45853216	30	499364
30466	Monastrol	YFP-RM-P604A	61600064	13	346500
30470	Monastrol	YFP-RM-P604A	50773224	15	438124
30481	Monastrol	YFP-RM-P604A	65621184	16	504447
30501	Monastrol	YFP-RM-P604A	93123088	18	579408
30506	Monastrol	YFP-RM-P604A	89271128	34	1284337
30509	Monastrol	YFP-RM-P604A	94805600	16	482598
30513	Monastrol	YFP-RM-P604A	101644100	60	2556560
30520	Monastrol	YFP-RM-P604A	110532120	27	1300800
30578	Monastrol	YFP-RM-P604A	61840752	9	214952
30583	Monastrol	YFP-RM-P604A	75492664	11	369296
30631	Monastrol	YFP-RM-P604A	85383552	18	594557
30635	Monastrol	YFP-RM-P604A	93324112	15	592841
30636	Monastrol	YFP-RM-P604A	81575824	17	888357
30657	Monastrol	YFP-RM-P604A	77276664	15	471787
30670	Monastrol	YFP-RM-P604A	109846820	23	1056801
30698	Monastrol	YFP-RM-P604A	74165880	21	664145
30755	Monastrol	YFP-RM-P604A	108343020	43	2837892
30810	Monastrol	YFP-RM-P604A	110921670	26	1635627
30816	Monastrol	YFP-RM-P604A	59249992	23	634648
30844	Monastrol	YFP-RM-P604A	55945252	10	240260
30860	Monastrol	YFP-RM-P604A	97579664	35	1559663
30885	Monastrol	YFP-RM-P604A	64734416	7	206631
30890	Monastrol	YFP-RM-P604A	70239800	20	488286
30908	Monastrol	YFP-RM-P604A	91085512	9	489152
30914	Monastrol	YFP-RM-P604A	89518592	10	381519
30930	Monastrol	YFP-RM-P604A	71355896	12	444481
30945	Monastrol	YFP-RM-P604A	113700000	12	656965
31012	Monastrol	YFP-RM-P604A	93631936	22	908388
31066	Monastrol	YFP-RM-P604A	74546040	10	315820
31083	Monastrol	YFP-RM-P604A	102892070	38	1960018
31153	Monastrol	YFP-RM-P604A	111112920	19	751849
31191	Monastrol	YFP-RM-P604A	118472860	24	1664254
31216	Monastrol	YFP-RM-P604A	116994850	24	1128697
31232	Monastrol	YFP-RM-P604A	86257736	20	1022136
31236	Monastrol	YFP-RM-P604A	90912376	8	334525
31248	Monastrol	YFP-RM-P604A	94687872	13	521216
31300	Monastrol	YFP-RM-P604A	114464390	23	1463265
31326	Monastrol	YFP-RM-P604A	88099936	27	1022496
31340	Monastrol	YFP-RM-P604A	95100256	26	849944
31350	Monastrol	YFP-RM-P604A	96580312	35	2370314
31358	Monastrol	YFP-RM-P604A	127374720	36	1867993
31383	Monastrol	YFP-RM-P604A	100727830	21	1006130
31410	Monastrol	YFP-RM-P604A	98807672	12	752476
31454	Monastrol	YFP-RM-P604A	99630776	20	1110568
31477	Monastrol	YFP-RM-P604A	59733620	5	213208
31478	Monastrol	YFP-RM-P604A	105672300	32	1800911
31488	Monastrol	YFP-RM-P604A	69302400	1	9600
31506	Monastrol	YFP-RM-P604A	107963580	45	3797065
31512	Monastrol	YFP-RM-P604A	90421368	13	613537
31532	Monastrol	YFP-RM-P604A	91991416	12	879510
31549	Monastrol	YFP-RM-P604A	76197056	12	716724
31554	Monastrol	YFP-RM-P604A	71015576	43	1792182
31563	Monastrol	YFP-RM-P604A	74409288	23	742339
31606	Monastrol	YFP-RM-P604A	90557128	40	1940236
31632	Monastrol	YFP-RM-P604A	92036776	6	178564
31750	Monastrol	YFP-RM-P604A	106652500	26	1151534
31766	Monastrol	YFP-RM-P604A	98981312	20	654367
31769	Monastrol	YFP-RM-P604A	119981420	32	2082132
31789	Monastrol	YFP-RM-P604A	100132110	3	99908
31822	Monastrol	YFP-RM-P604A	111392380	7	287229
31833	Monastrol	YFP-RM-P604A	44618416	2	53481
31860	Monastrol	YFP-RM-P604A	24800990	5	112111
31911	Monastrol	YFP-RM-P604A	95352080	38	1478634
31927	Monastrol	YFP-RM-P604A	69754848	12	409148
31939	Monastrol	YFP-RM-P604A	93711088	4	128342
31945	Monastrol	YFP-RM-P604A	97735128	37	1776108
31946	Monastrol	YFP-RM-P604A	92476784	13	487131
31958	Monastrol	YFP-RM-P604A	51870488	8	207859
31972	Monastrol	YFP-RM-P604A	96386448	12	466159
31992	Monastrol	YFP-RM-P604A	122859930	18	778770.99
32044	Monastrol	YFP-RM-P604A	102292540	10	328253
32066	Monastrol	YFP-RM-P604A	97644648	12	472767
32100	Monastrol	YFP-RM-P604A	96329280	27	1458033
32141	Monastrol	YFP-RM-P604A	116300410	17	635473
32174	Monastrol	YFP-RM-P604A	76410392	30	1828705
32180	Monastrol	YFP-RM-P604A	65427736	12	247355
32181	Monastrol	YFP-RM-P604A	90000152	6	259166
32191	Monastrol	YFP-RM-P604A	98760640	15	752358
32222	Monastrol	YFP-RM-P604A	128174580	7	384499
32226	Monastrol	YFP-RM-P604A	121315730	10	527097
32227	Monastrol	YFP-RM-P604A	89371320	23	1069072
32232	Monastrol	YFP-RM-P604A	69732392	21	767365
32250	Monastrol	YFP-RM-P604A	136321460	12	567538
32272	Monastrol	YFP-RM-P604A	83678272	15	517249
32309	Monastrol	YFP-RM-P604A	69350728	21	608400
32325	Monastrol	YFP-RM-P604A	98938840	27	1493451
32332	Monastrol	YFP-RM-P604A	98560480	37	1959766
32366	Monastrol	YFP-RM-P604A	104327180	27	1940636
32406	Monastrol	YFP-RM-P604A	116532910	37	2903262
32523	Monastrol	YFP-RM-P604A	108784140	23	1910248
32698	Monastrol	YFP-RM-P604A	97367744	22	2058213
32736	Monastrol	YFP-RM-P604A	76181328	1	11498
32837	Monastrol	YFP-RM-P604A	60564336	26	1237749
33003	Monastrol	YFP-RM-P604A	115980740	63	3972976
33076	Monastrol	YFP-RM-P604A	101519700	16	1599160
33104	Monastrol	YFP-RM-P604A	43225160	13	341287
33111	Monastrol	YFP-RM-P604A	106993700	24	1442358
33163	Monastrol	YFP-RM-P604A	104836010	27	1969182
33164	Monastrol	YFP-RM-P604A	77116352	40	1483545
33166	Monastrol	YFP-RM-P604A	86236840	25	1038511
33180	Monastrol	YFP-RM-P604A	100305260	36	2879223
33186	Monastrol	YFP-RM-P604A	99793704	55	3211598
33221	Monastrol	YFP-RM-P604A	47435508	4	101206
33280	Monastrol	YFP-RM-P604A	108674060	9	389240
33323	Monastrol	YFP-RM-P604A	102899350	27	1523697
33325	Monastrol	YFP-RM-P604A	80576944	13	514489
33336	Monastrol	YFP-RM-P604A	100123330	16	729235
33351	Monastrol	YFP-RM-P604A	59227972	6	226695
33373	Monastrol	YFP-RM-P604A	85804864	14	578732
33378	Monastrol	YFP-RM-P604A	97845376	34	1382181
33408	Monastrol	YFP-RM-P604A	61829820	17	572243
33443	Monastrol	YFP-RM-P604A	66264828	33	1083628
33506	Monastrol	YFP-RM-P604A	101972420	26	1052272
33510	Monastrol	YFP-RM-P604A	75218912	21	1886976
33574	Monastrol	YFP-RM-P604A	79099720	35	1456642
33576	Monastrol	YFP-RM-P604A	92977680	18	682011
33615	Monastrol	YFP-RM-P604A	61612828	10	222645
33619	Monastrol	YFP-RM-P604A	84869504	13	559047
33652	Monastrol	YFP-RM-P604A	84081792	32	1244608
33674	Monastrol	YFP-RM-P604A	87786312	18	530159
33700	Monastrol	YFP-RM-P604A	77885248	13	745801
33702	Monastrol	YFP-RM-P604A	86265440	16	800370.01
33760	Monastrol	YFP-RM-P604A	66591788	10	362893
33793	Monastrol	YFP-RM-P604A	139662610	27	1045189
33877	Monastrol	YFP-RM-P604A	90953384	8	233528
33893	Monastrol	YFP-RM-P604A	40875868	23	773191
33965	Monastrol	YFP-RM-P604A	113647250	30	1902064
34670	Monastrol	YFP-RM-P604A	58245864	15	502201
34770	Monastrol	YFP-RM-P604A	101514940	29	1531667
34771	Monastrol	YFP-RM-P604A	58836580	16	450408
34796	Monastrol	YFP-RM-P604A	87196760	27	972933
34801	Monastrol	YFP-RM-P604A	109993050	42	2736035
34878	Monastrol	YFP-RM-P604A	83958296	13	513362
34882	Monastrol	YFP-RM-P604A	107839710	18	1140240
34898	Monastrol	YFP-RM-P604A	75294864	18	898902
34965	Monastrol	YFP-RM-P604A	92714392	16	686453
34985	Monastrol	YFP-RM-P604A	87399592	17	637370
34988	Monastrol	YFP-RM-P604A	106385550	25	1568824
35023	Monastrol	YFP-RM-P604A	76162696	37	2304205
35028	Monastrol	YFP-RM-P604A	96013184	27	1183624
35034	Monastrol	YFP-RM-P604A	104211030	30	1347007
35059	Monastrol	YFP-RM-P604A	71277840	28	1600387
35069	Monastrol	YFP-RM-P604A	111316420	27	1636047
35076	Monastrol	YFP-RM-P604A	108984750	25	1655475
35125	Monastrol	YFP-RM-P604A	89141744	6	149347
35129	Monastrol	YFP-RM-P604A	61926812	14	400429
35134	Monastrol	YFP-RM-P604A	77332008	5	130070
35184	Monastrol	YFP-RM-P604A	111116220	21	1301429
35229	Monastrol	YFP-RM-P604A	91354192	15	847843
35243	Monastrol	YFP-RM-P604A	127553250	9	755034
35274	Monastrol	YFP-RM-P604A	75262352	4	182978
35318	Monastrol	YFP-RM-P604A	98996864	17	765038
35329	Monastrol	YFP-RM-P604A	92878024	33	1145499
35363	Monastrol	YFP-RM-P604A	78542016	38	2002930
35364	Monastrol	YFP-RM-P604A	96638616	38	1889715
35422	Monastrol	YFP-RM-P604A	73190464	12	394332
35467	Monastrol	YFP-RM-P604A	105020370	4	271735.99
35491	Monastrol	YFP-RM-P604A	89700528	11	361452
35523	Monastrol	YFP-RM-P604A	106254140	2	103354
35556	Monastrol	YFP-RM-P604A	119892580	15	841029
35584	Monastrol	YFP-RM-P604A	57015100	14	419535
35598	Monastrol	YFP-RM-P604A	47082244	13	388507
35642	Monastrol	YFP-RM-P604A	119817420	35	1766761
35659	Monastrol	YFP-RM-P604A	99417304	26	1069383
35661	Monastrol	YFP-RM-P604A	80419960	22	654386
35680	Monastrol	YFP-RM-P604A	105825650	5	299900
35697	Monastrol	YFP-RM-P604A	104185560	52	2499911
35726	Monastrol	YFP-RM-P604A	82474608	25	988070
35775	Monastrol	YFP-RM-P604A	93746752	21	686603
35818	Monastrol	YFP-RM-P604A	90144032	30	2077589
35875	Monastrol	YFP-RM-P604A	125813850	23	1584186
35937	Monastrol	YFP-RM-P604A	95327440	50	2903935
35950	Monastrol	YFP-RM-P604A	80976912	22	904322
35965	Monastrol	YFP-RM-P604A	114291840	16	637954
36025	Monastrol	YFP-RM-P604A	96666312	27	999661
36035	Monastrol	YFP-RM-P604A	61074900	19	1115727
36126	Monastrol	YFP-RM-P604A	38173296	11	349385
36127	Monastrol	YFP-RM-P604A	26340036	8	204353
36321	Monastrol	YFP-RM-P604A	81161928	22	957470
36332	Monastrol	YFP-RM-P604A	29283200	5	229783
36646	Monastrol	YFP-RM-P604A	102772690	23	980424
36710	Monastrol	YFP-RM-P604A	83770224	11	576508
36739	Monastrol	YFP-RM-P604A	88586448	11	466128
36776	Monastrol	YFP-RM-P604A	125379770	29	1744829
36871	Monastrol	YFP-RM-P604A	84024096	36	1404122
36877	Monastrol	YFP-RM-P604A	58687216	12	429017
36908	Monastrol	YFP-RM-P604A	91218368	6	214930
36945	Monastrol	YFP-RM-P604A	106886500	22	1355829
36956	Monastrol	YFP-RM-P604A	64767484	16	770282
36974	Monastrol	YFP-RM-P604A	122196710	16	1664128
36978	Monastrol	YFP-RM-P604A	72753240	19	520341
37009	Monastrol	YFP-RM-P604A	79754320	27	1123589
37023	Monastrol	YFP-RM-P604A	103987820	17	646011
37070	Monastrol	YFP-RM-P604A	115779210	16	1057762
37121	Monastrol	YFP-RM-P604A	61308164	11	469247
37174	Monastrol	YFP-RM-P604A	98262888	27	1227864
37177	Monastrol	YFP-RM-P604A	99888336	41	2379323
37183	Monastrol	YFP-RM-P604A	77329048	23	670598
37208	Monastrol	YFP-RM-P604A	100597700	26	991139
37212	Monastrol	YFP-RM-P604A	73590456	16	607426
37220	Monastrol	YFP-RM-P604A	135498240	25	1796542
37222	Monastrol	YFP-RM-P604A	86912432	19	676890
37300	Monastrol	YFP-RM-P604A	97882672	43	1454371
37329	Monastrol	YFP-RM-P604A	93999504	39	2243051
37343	Monastrol	YFP-RM-P604A	101376660	28	1230974
37346	Monastrol	YFP-RM-P604A	117627500	20	842178
37376	Monastrol	YFP-RM-P604A	91900464	37	1792693
37379	Monastrol	YFP-RM-P604A	110603840	22	760701
37389	Monastrol	YFP-RM-P604A	112807460	16	749729
37397	Monastrol	YFP-RM-P604A	90748040	18	685493
37406	Asynchronous	Control	115961210	4	150153
37489	Asynchronous	Control	96139560	10	285877
37502	Asynchronous	Control	137453840	22	573638
37504	Asynchronous	Control	89530520	3	73524
37602	Asynchronous	Control	108495100	5	167100
37626	Asynchronous	Control	87890592	8	226196
37700	Asynchronous	Control	83539928	14	357974
37758	Asynchronous	Control	101691190	7	216804
37962	Asynchronous	Control	106407660	2	40545
37967	Asynchronous	Control	76077152	2	54987
37969	Asynchronous	Control	105473140	8	194784
37996	Asynchronous	Control	89867304	15	391481
37998	Asynchronous	Control	103466350	5	110659
38009	Asynchronous	Control	84952184	2	25466
38049	Asynchronous	Control	126772140	3	69932
38065	Asynchronous	Control	100265300	4	103558
38074	Asynchronous	Control	100763110	0	0
38083	Asynchronous	Control	70182296	10	212514
38105	Asynchronous	Control	88070448	6	110279
38107	Asynchronous	Control	115883180	2	69150998
38150	Asynchronous	Control	64675744	11	276759
38168	Asynchronous	Control	67639496	23	578463
38199	Asynchronous	Control	80027112	9	234398
38251	Asynchronous	Control	80697560	18	604020
38310	Asynchronous	Control	90825728	18	409506
38349	Asynchronous	Control	72996096	16	404377
38459	Asynchronous	Control	93759664	5	97601001
38487	Asynchronous	Control	117496020	2	146299
38505	Asynchronous	Control	132656050	1	20938
38535	Asynchronous	Control	104432430	0	0
38541	Asynchronous	Control	63639184	3	32420
38544	Asynchronous	Control	95141744	0	0
38545	Asynchronous	Control	80906224	10	188233
38633	Asynchronous	Control	84463600	7	187216
38675	Asynchronous	Control	71678304	1	14368
38681	Asynchronous	Control	68993856	4	88470
38691	Asynchronous	Control	87567448	1	37170
38739	Asynchronous	Control	97917552	4	86540
38755	Asynchronous	Control	66494836	5	107665
38762	Asynchronous	Control	78846504	0	0
39007	Asynchronous	Control	86477304	15	388814
39013	Asynchronous	Control	106776130	7	234469
39100	Asynchronous	Control	60410116	0	0
39233	Asynchronous	Control	97779816	4	134239
39371	Asynchronous	Control	77657520	2	50980
39396	Asynchronous	Control	70369328	6	212374
39404	Asynchronous	Control	64467988	3	61914
39487	Asynchronous	Control	83726112	40	977769.01
39563	Asynchronous	Control	104939570	0	0
39571	Asynchronous	Control	112231330	8	164726
39610	Asynchronous	Control	94540216	7	146239
39626	Asynchronous	Control	70764952	3	75723
39655	Asynchronous	Control	76594816	5	116086
39728	Asynchronous	Control	81595408	0	0
39729	Asynchronous	Control	79634744	2	33407
39793	Asynchronous	Control	102432010	0	0
39890	Asynchronous	Control	79883568	9	192934
39959	Asynchronous	Control	95020680	2	49748
39991	Asynchronous	Control	61263668	1	78510005
40005	Asynchronous	Control	138066480	0	0
40103	Asynchronous	Control	86854784	2	30920
40116	Asynchronous	Control	92210704	20	446256
40231	Asynchronous	Control	76560032	5	135651
40318	Asynchronous	Control	88005664	4	97822002
40461	Asynchronous	Control	39481492	14	390217
40627	Asynchronous	Control	94573440	6	190902
40703	Asynchronous	Control	109404120	1	76330
40728	Asynchronous	Control	91571832	13	368125
40901	Asynchronous	Control	99487736	8	268132
41168	Asynchronous	Control	118568500	0	0
41212	Asynchronous	Control	106966660	0	0
41306	Asynchronous	YFP-RM-WT	29609900	36	1100296
41318	Asynchronous	YFP-RM-WT	104586300	0	0
41379	Asynchronous	YFP-RM-WT	101953560	9	542536.99
41439	Asynchronous	YFP-RM-WT	103297420	13	606857.01
41490	Asynchronous	YFP-RM-WT	102057160	4	240235
41499	Asynchronous	YFP-RM-WT	49251732	10	228440
41528	Asynchronous	YFP-RM-WT	91631328	1	34297
41547	Asynchronous	YFP-RM-WT	100275150	3	252324.99
41601	Asynchronous	YFP-RM-WT	89888760	12	670356
41693	Asynchronous	YFP-RM-WT	63395148	11	482856
41709	Asynchronous	YFP-RM-WT	108010070	2	296373
41720	Asynchronous	YFP-RM-WT	73758784	5	190981
41738	Asynchronous	YFP-RM-WT	105353720	8	488855
41923	Asynchronous	YFP-RM-WT	74347936	19	1033759
42014	Asynchronous	YFP-RM-WT	102150690	7	386234
42021	Asynchronous	YFP-RM-WT	76348488	20	637334
42139	Asynchronous	YFP-RM-WT	101019470	8	373568
42152	Asynchronous	YFP-RM-WT	105884850	31	1363827
42176	Asynchronous	YFP-RM-WT	125932030	34	1257339
42237	Asynchronous	YFP-RM-WT	102602460	9	655310
42252	Asynchronous	YFP-RM-WT	100744260	19	1816798
42281	Asynchronous	YFP-RM-WT	98135296	1	57027
42313	Asynchronous	YFP-RM-WT	84636472	6	204676
42337	Asynchronous	YFP-RM-WT	53978432	19	591082
42372	Asynchronous	YFP-RM-WT	89052816	22	1096541
42378	Asynchronous	YFP-RM-WT	95917776	24	1287185
42447	Asynchronous	YFP-RM-WT	83733656	25	996547
42566	Asynchronous	YFP-RM-WT	84723320	33	1621629
42642	Asynchronous	YFP-RM-WT	96055872	8	392753
42653	Asynchronous	YFP-RM-WT	126254080	1	62203
42682	Asynchronous	YFP-RM-WT	88263784	11	432097
42686	Asynchronous	YFP-RM-WT	124198170	3	266738
42694	Asynchronous	YFP-RM-WT	74789416	35	1139876
42834	Asynchronous	YFP-RM-WT	109839340	6	184267
42837	Asynchronous	YFP-RM-WT	70490424	15	452612
42841	Asynchronous	YFP-RM-WT	99011448	3	161668
42863	Asynchronous	YFP-RM-WT	105743400	2	79193
42875	Asynchronous	YFP-RM-WT	67732728	17	538585
42971	Asynchronous	YFP-RM-WT	77046424	9	245113
42984	Asynchronous	YFP-RM-WT	77168584	7	249288
43012	Asynchronous	YFP-RM-WT	140746930	3	328852
43023	Asynchronous	YFP-RM-WT	86241608	5	184346
43092	Asynchronous	YFP-RM-WT	79437128	8	472392.01
43094	Asynchronous	YFP-RM-WT	92274904	5	273647
43107	Asynchronous	YFP-RM-WT	55114756	24	576595
43274	Asynchronous	YFP-RM-WT	92688720	3	131899
43355	Asynchronous	YFP-RM-WT	88519672	5	129308
43547	Asynchronous	YFP-RM-WT	121921470	12	858698
43600	Asynchronous	YFP-RM-WT	57601180	14	571923
43782	Asynchronous	YFP-RM-WT	79407024	5	222563
43824	Asynchronous	YFP-RM-WT	92556576	18	911714
43879	Asynchronous	YFP-RM-WT	108273540	17	594164
44061	Asynchronous	YFP-RM-WT	79899088	36	1538956
44102	Asynchronous	YFP-RM-WT	104875880	16	1154305
44124	Asynchronous	YFP-RM-WT	111167950	3	366104
44201	Asynchronous	YFP-RM-WT	90189232	4	251934
44225	Asynchronous	YFP-RM-WT	73842384	4	206666
44288	Asynchronous	YFP-RM-WT	42469488	7	662331
44376	Asynchronous	YFP-RM-WT	112583170	0	0
44383	Asynchronous	YFP-RM-WT	34486092	25	1087468
44560	Asynchronous	YFP-RM-WT	96905088	1	63340
44601	Asynchronous	YFP-RM-WT	87925808	36	1930948
44628	Asynchronous	YFP-RM-WT	67448576	23	861343
44704	Asynchronous	YFP-RM-WT	88123560	15	533027
44709	Asynchronous	YFP-RM-WT	79377736	28	1295613
44711	Asynchronous	YFP-RM-WT	73556824	3	81141
44726	Asynchronous	YFP-RM-WT	61307684	9	289293
44751	Asynchronous	YFP-RM-WT	56114724	5	151413
44831	Asynchronous	YFP-RM-WT	80495648	8	238698
44966	Asynchronous	YFP-RM-WT	74900328	32	1302715
45248	Asynchronous	YFP-RM-WT	82548376	26	1331576
45253	Asynchronous	YFP-RM-WT	73693528	12	425776
45417	Asynchronous	YFP-RM-WT	67768656	7	215686
45521	Asynchronous	YFP-RM-WT	49955224	12	414742
45583	Asynchronous	YFP-RM-WT	65461196	5	137536
46047	Asynchronous	YFP-RM-WT	103886490	14	510940
46056	Asynchronous	YFP-RM-WT	63472464	20	858639
46119	Asynchronous	YFP-RM-WT	31874214	0	0
46158	Asynchronous	YFP-RM-WT	97005216	32	1921049
46179	Asynchronous	YFP-RM-WT	92218328	8	333802
46187	Asynchronous	YFP-RM-WT	63351532	12	388009
46203	Asynchronous	YFP-RM-WT	81580352	12	375468
46227	Asynchronous	YFP-RM-WT	62458564	3	84272
46284	Asynchronous	YFP-RM-WT	74796256	2	66997
46365	Asynchronous	YFP-RM-WT	54652004	2	74784
46366	Asynchronous	YFP-RM-WT	105004820	5	176483
46378	Asynchronous	YFP-RM-WT	68464424	12	516767
46457	Asynchronous	YFP-RM-WT	94557256	2	181557
46525	Asynchronous	YFP-RM-WT	78106472	20	985586.99
46554	Asynchronous	YFP-RM-WT	93362816	1	49326
46584	Asynchronous	YFP-RM-WT	72125208	7	245118
46638	Asynchronous	YFP-RM-WT	104743930	7	412395
46661	Asynchronous	YFP-RM-WT	106558480	1	25419002
46700	Asynchronous	YFP-RM-WT	70842152	7	244661
46702	Asynchronous	YFP-RM-WT	84174728	12	373351
46707	Asynchronous	YFP-RM-WT	80463000	21	1041010
46791	Asynchronous	YFP-RM-WT	75759856	2	91355
46876	Asynchronous	YFP-RM-WT	75431736	5	202300
47001	Asynchronous	YFP-RM-WT	94065752	25	1032578
47058	Asynchronous	YFP-RM-WT	107676870	4	218064
47093	Asynchronous	YFP-RM-WT	53641028	11	353634
47168	Asynchronous	YFP-RM-WT	111989410	1	92347
47195	Asynchronous	YFP-RM-WT	83825120	20	831419
47280	Asynchronous	YFP-RM-WT	111857450	29	2608751
47496	Asynchronous	YFP-RM-WT	99146400	0	0
47542	Asynchronous	YFP-RM-WT	116953960	17	653576
47584	Asynchronous	YFP-RM-WT	46452700	9	338056
47588	Asynchronous	YFP-RM-WT	86170928	16	855567
47591	Asynchronous	YFP-RM-WT	44875428	9	744265
47610	Asynchronous	YFP-RM-WT	92695920	26	2418565
47917	Asynchronous	YFP-RM-WT	89255576	19	980087
48020	Asynchronous	YFP-RM-WT	84473128	0	0
48068	Asynchronous	YFP-RM-WT	72857848	15	588769
48290	Asynchronous	YFP-RM-WT	112243130	1	114619
48356	Asynchronous	YFP-RM-WT	107282450	20	638350
48407	Asynchronous	YFP-RM-WT	57408824	7	150631
48411	Asynchronous	YFP-RM-WT	82260896	17	737940
48461	Asynchronous	YFP-RM-WT	103714800	0	0
48531	Asynchronous	YFP-RM-WT	95266216	2	103896
48577	Asynchronous	YFP-RM-WT	81991680	8	355385.01
48580	Asynchronous	YFP-RM-WT	92786136	31	1399470
48588	Asynchronous	YFP-RM-WT	70737616	3	99123
48601	Asynchronous	YFP-RM-WT	78024304	0	0
48632	Asynchronous	YFP-RM-WT	70155888	4	176206
48633	Asynchronous	YFP-RM-WT	87251800	16	562010
48641	Asynchronous	YFP-RM-WT	41546772	8	415431
48659	Asynchronous	YFP-RM-WT	75839248	5	284142
48710	Asynchronous	YFP-RM-WT	82395224	16	608570
48716	Asynchronous	YFP-RM-WT	46584036	17	445091
48742	Asynchronous	YFP-RM-WT	62694596	10	273455
48799	Asynchronous	YFP-RM-P604A	84076568	4	105602
48848	Asynchronous	YFP-RM-P604A	98595280	4	266479
48935	Asynchronous	YFP-RM-P604A	124204880	12	1772459
49069	Asynchronous	YFP-RM-P604A	89178688	8	407480
49090	Asynchronous	YFP-RM-P604A	76380520	23	945492
49172	Asynchronous	YFP-RM-P604A	59387736	25	801607
49174	Asynchronous	YFP-RM-P604A	89372032	6	187830
49191	Asynchronous	YFP-RM-P604A	87748976	9	472984
49238	Asynchronous	YFP-RM-P604A	82963336	35	1616775
49303	Asynchronous	YFP-RM-P604A	87249064	4	135513
49344	Asynchronous	YFP-RM-P604A	98414072	2	87884
49389	Asynchronous	YFP-RM-P604A	116970490	11	1114338
49395	Asynchronous	YFP-RM-P604A	77876848	3	153919
49434	Asynchronous	YFP-RM-P604A	55128288	8	237062
49537	Asynchronous	YFP-RM-P604A	100654220	14	1039244
49662	Asynchronous	YFP-RM-P604A	89419136	25	1013145
49717	Asynchronous	YFP-RM-P604A	32361716	10	353897
49798	Asynchronous	YFP-RM-P604A	85619024	21	828274
49832	Asynchronous	YFP-RM-P604A	56806984	14	379186
49841	Asynchronous	YFP-RM-P604A	70416944	5	144424
49947	Asynchronous	YFP-RM-P604A	75086800	13	542367
49976	Asynchronous	YFP-RM-P604A	83836368	18	833236
50051	Asynchronous	YFP-RM-P604A	63870436	13	648007
50097	Asynchronous	YFP-RM-P604A	45263640	3	34375
50100	Asynchronous	YFP-RM-P604A	108777340	0	0
50101	Asynchronous	YFP-RM-P604A	62616212	26	870058
50327	Asynchronous	YFP-RM-P604A	94255952	13	737448.01
50495	Asynchronous	YFP-RM-P604A	83073552	9	366218
50540	Asynchronous	YFP-RM-P604A	99305960	5	472940
50553	Asynchronous	YFP-RM-P604A	97227328	23	1195879
50694	Asynchronous	YFP-RM-P604A	116118140	2	125262.99
50712	Asynchronous	YFP-RM-P604A	76820512	1	18235
50783	Asynchronous	YFP-RM-P604A	95822264	7	177402
50899	Asynchronous	YFP-RM-P604A	70895424	34	1046030
50908	Asynchronous	YFP-RM-P604A	96752560	9	622237.99
50910	Asynchronous	YFP-RM-P604A	58921668	12	460112
50975	Asynchronous	YFP-RM-P604A	64006828	3	35827
51035	Asynchronous	YFP-RM-P604A	67932480	3	102959
51080	Asynchronous	YFP-RM-P604A	75704944	0	0
51137	Asynchronous	YFP-RM-P604A	80461752	9	383090
51140	Asynchronous	YFP-RM-P604A	97165432	13	876558
51141	Asynchronous	YFP-RM-P604A	103388780	15	1407063
51166	Asynchronous	YFP-RM-P604A	92219480	8	343594
51275	Asynchronous	YFP-RM-P604A	71396120	13	403096
51291	Asynchronous	YFP-RM-P604A	89646848	5	210373
51352	Asynchronous	YFP-RM-P604A	92969792	6	265301
51373	Asynchronous	YFP-RM-P604A	75987504	6	287810
51565	Asynchronous	YFP-RM-P604A	63943468	8	332318
51605	Asynchronous	YFP-RM-P604A	80066432	29	2092787
51656	Asynchronous	YFP-RM-P604A	85501776	15	686389
51681	Asynchronous	YFP-RM-P604A	83318832	14	621810
52011	Asynchronous	YFP-RM-P604A	51065512	10	418548
52047	Asynchronous	YFP-RM-P604A	95322800	3	92462
52198	Asynchronous	YFP-RM-P604A	92214208	8	321871
52248	Asynchronous	YFP-RM-P604A	60395296	14	449090
52259	Asynchronous	YFP-RM-P604A	75497576	10	438804
52285	Asynchronous	YFP-RM-P604A	67468784	8	193948
52375	Asynchronous	YFP-RM-P604A	83961616	0	0
52452	Asynchronous	YFP-RM-P604A	69564848	19	673404
52480	Asynchronous	YFP-RM-P604A	82895432	8	274380
52494	Asynchronous	YFP-RM-P604A	114941820	6	349730
52543	Asynchronous	YFP-RM-P604A	90124584	12	483751
52615	Asynchronous	YFP-RM-P604A	82532096	9	362838
52620	Asynchronous	YFP-RM-P604A	57473128	8	270282
52805	Asynchronous	YFP-RM-P604A	51163444	5	146998
52830	Asynchronous	YFP-RM-P604A	67401536	19	878286.99
52839	Asynchronous	YFP-RM-P604A	107703860	7	659517
52845	Asynchronous	YFP-RM-P604A	56808780	21	857121
52892	Asynchronous	YFP-RM-P604A	120983160	38	1624498
52933	Asynchronous	YFP-RM-P604A	105080460	7	574386
52975	Asynchronous	YFP-RM-P604A	56556204	14	451398
53082	Asynchronous	YFP-RM-P604A	107149170	26	983464
53131	Asynchronous	YFP-RM-P604A	77715704	6	272251
53427	Asynchronous	YFP-RM-P604A	68269176	22	1500839
53518	Asynchronous	YFP-RM-P604A	64157004	8	340147
53827	Asynchronous	YFP-RM-P604A	80477072	29	2172181
53834	Asynchronous	YFP-RM-P604A	81198824	5	176305
53850	Asynchronous	YFP-RM-P604A	88698624	13	680485
53881	Asynchronous	YFP-RM-P604A	104374010	17	1349399
53887	Asynchronous	YFP-RM-P604A	67260784	14	452807
53925	Asynchronous	YFP-RM-P604A	121576470	8	646523
53969	Asynchronous	YFP-RM-P604A	21667488	19	413180
53995	Asynchronous	YFP-RM-P604A	92618632	17	1173972
54070	Asynchronous	YFP-RM-P604A	78963184	24	2136322
54215	Asynchronous	YFP-RM-P604A	57998596	12	472670
54219	Asynchronous	YFP-RM-P604A	102153850	3	121344
54269	Asynchronous	YFP-RM-P604A	91164256	4	275326
54271	Asynchronous	YFP-RM-P604A	85303720	1	52023
54291	Asynchronous	YFP-RM-P604A	79749760	17	486210
54330	Asynchronous	YFP-RM-P604A	64387608	4	99708
54333	Asynchronous	YFP-RM-P604A	43388048	1	50965
54381	Asynchronous	YFP-RM-P604A	75694088	18	833572
54390	Asynchronous	YFP-RM-P604A	97061080	1	60575
54408	Asynchronous	YFP-RM-P604A	70750480	13	614009.99
54452	Asynchronous	YFP-RM-P604A	69661008	22	937495
54485	Asynchronous	YFP-RM-P604A	52726664	15	425412
54507	Asynchronous	YFP-RM-P604A	120576950	4	284734
54546	Asynchronous	YFP-RM-P604A	59720124	15	476158
54570	Asynchronous	YFP-RM-P604A	66516996	4	173182
54627	Asynchronous	YFP-RM-P604A	78530768	14	686763
54670	Asynchronous	YFP-RM-P604A	64301232	0	0
54709	Asynchronous	YFP-RM-P604A	88259608	11	482265
54715	Asynchronous	YFP-RM-P604A	78940496	31	1386352
54721	Asynchronous	YFP-RM-P604A	83445576	4	156909
54725	Asynchronous	YFP-RM-P604A	51504176	11	421282
54770	Asynchronous	YFP-RM-P604A	65268472	14	437482
54775	Asynchronous	YFP-RM-P604A	64812576	17	688800
54792	Asynchronous	YFP-RM-P604A	105454100	1	10396
54796	Asynchronous	YFP-RM-P604A	64510436	11	311578
54828	Asynchronous	YFP-RM-P604A	76038528	15	609494
54831	Asynchronous	YFP-RM-P604A	77939920	11	424911
54852	Asynchronous	YFP-RM-P604A	61172268	9	299043
54863	Asynchronous	YFP-RM-P604A	66126236	2	50387
54889	Asynchronous	YFP-RM-P604A	59639768	12	476206
54967	Asynchronous	YFP-RM-P604A	89483408	16	858717
55010	Asynchronous	YFP-RM-P604A	81194232	4	152061
55076	Asynchronous	YFP-RM-P604A	69524352	36	1739944
55133	Asynchronous	YFP-RM-P604A	89570752	18	720535.99
55141	Asynchronous	YFP-RM-P604A	66965284	15	613314
55150	Asynchronous	YFP-RM-P604A	99031224	0	0
55184	Asynchronous	YFP-RM-P604A	65657164	27	976639
55194	Asynchronous	YFP-RM-P604A	53013688	14	380199
55235	Asynchronous	YFP-RM-P604A	51605328	1	40935
55270	Asynchronous	YFP-RM-P604A	60686396	7	301956
55282	Asynchronous	YFP-RM-P604A	122233690	1	198528
55801	Asynchronous	YFP-RM-P604A	80767256	6	337062
56057	Asynchronous	YFP-RM-P604A	94624720	1	45294
56178	Asynchronous	YFP-RM-P604A	71144392	12	516178
56214	Asynchronous	YFP-RM-P604A	69699256	5	246589
56242	Asynchronous	YFP-RM-P604A	66254868	11	434459
56414	Asynchronous	YFP-RM-P604A	72860728	16	590046
56519	Asynchronous	YFP-RM-P604A	77364720	2	26659
56541	Asynchronous	YFP-RM-P604A	63052912	17	554959
56593	Asynchronous	YFP-RM-P604A	78540360	4	119146
56751	Asynchronous	YFP-RM-P604A	46264812	5	98994002
56761	Asynchronous	YFP-RM-P604A	52543704	13	373369
56852	Asynchronous	YFP-RM-P604A	81094064	10	480823
56859	Asynchronous	YFP-RM-P604A	101452780	1	41410
56876	Asynchronous	YFP-RM-P604A	85750432	10	549245
